# Supplementary material for: Efficient separation of xylene isomers by nonporous adaptive crystals of hybrid[3]arene in both vapor and liquid phases
Source: Royal Society of Chemistry journal article supplement (doi:10.1039/d3qm01231j), 2024-01-01
Supplement: d3qm01231j1.pdf [file d3qm01231j1.pdf]

## Efficient separation of xylene isomers by nonporous adaptive crystals of hybrid[3]arene in both vapor and liquid phases

Yuhao Wang,<sup>a</sup> Zhenyu Wang,<sup>a</sup> Shiqi Wei,<sup>a</sup> Sha Wu,<sup>a</sup> Mengbin Wang,<sup>\*b</sup> Guocan Yu,<sup>\*c</sup> Peng Chen,<sup>d</sup> Xiaowei Liu <sup>\*d</sup> and Jiong Zhou<sup>\*a</sup>

<sup>a</sup> Department of Chemistry, College of Sciences, Northeastern University, Shenyang 110819, P. R. China. E-mail: zhoujiong@mail.neu.edu.cn

<sup>b</sup> ZJU-Hangzhou Global Scientific and Technological Innovation Center, Zhejiang University, Hangzhou 311215, P. R. China. E-mail: 21737055@zju.edu.cn

<sup>c</sup> Key Laboratory of Bioorganic Phosphorus Chemistry & Chemical Biology, Department of Chemistry, Tsinghua University, Beijing 100084, P. R. China. E-mail: guocanyu@mail.tsinghua.edu.cn

<sup>d</sup> Zhejiang Key Laboratory of Drinking Water Safety and Distribution Technology, Zhejiang University, Hangzhou 310058, P. R. China. E-mail: liuxiaowei@zju.edu.cn

### Electronic Supplementary Information (30 pages)

|                                                                                           |     |
|-------------------------------------------------------------------------------------------|-----|
| 1. Materials                                                                              | S2  |
| 2. Methods                                                                                | S2  |
| 3. Synthesis of hybrid[3]arene <b>H</b>                                                   | S3  |
| 4. Crystallography data                                                                   | S4  |
| 5. Characterization of nonporous adaptive crystals of <b>H</b> ( <b>Ha</b> )              | S6  |
| 6. Adsorption experiments of <b>Ha</b> for single-component xylene isomers                | S7  |
| 7. Noncovalent interactions analysis in single crystal structures of host–guest complexes | S12 |
| 8. Uptake from the binary mixture of xylene isomers by <b>Ha</b>                          | S15 |
| 9. Uptake from the ternary mixture of xylene isomers by <b>Ha</b>                         | S21 |
| 10. Recyclability of <b>Ha</b>                                                            | S24 |
| 11. Liquid-phase adsorption                                                               | S25 |
| 12. Adsorption energies calculations of <b>Ha</b> for xylene isomers                      | S30 |
| 13. References                                                                            | S30 |

## 1. Materials

All chemicals, including *ortho*-xylene (***oX***), *meta*-xylene (***mX***) and *para*-xylene (***pX***), were purchased and used as received. Hybrid[3]arene (**H**) was synthesized as described previously.<sup>1</sup> Activated crystalline **H** (**H $\alpha$** ) was recrystallized from acetone and dried under vacuum at 120 °C overnight.<sup>2</sup>

**Table S1.** Physical properties of xylene isomers.

| Xylene isomers   | Boiling points (°C) | Melting points (°C) | Kinetic diameters (Å) |
|------------------|---------------------|---------------------|-----------------------|
| <b><i>oX</i></b> | 144.40              | -25.2               | 6.5                   |
| <b><i>mX</i></b> | 139.10              | -47.9               | 6.4                   |
| <b><i>pX</i></b> | 138.50              | 13.2                | 5.8                   |

## 2. Methods

### 2.1. Solution NMR

Solution <sup>1</sup>H NMR spectra were recorded at 600 MHz using a Bruker Avance 600 NMR spectrometer.

### 2.2. Powder X-ray diffraction

Powder X-ray diffraction (PXRD) data were collected on a Rigaku Ultimate-IV X-ray diffractometer operating at 40 kV/30 mA using the Mo K $\alpha$  line ( $\lambda = 1.5418$  Å). Data were measured over the range of 5–40° in 5°/min steps over 7 min.

### 2.3. Thermogravimetric analysis

Thermogravimetric analysis (TGA) was carried out using a Q5000IR analyzer (TA Instruments) with an automated vertical overhead thermobalance. The samples were heated at 10 °C/min using N<sub>2</sub> as the protective gas.

### 2.4. Single crystal growth

Single crystals of ***oX*@H** and ***mX*@H** were grown by slow evaporation: 3.00 mg of dry **H $\alpha$**  powders were put in a small vial where 1 mL of ***oX*** or ***mX*** was added. Then adding chloroform until all **H $\alpha$**  powders were dissolved. The resultant transparent solution was allowed to evaporate slowly to give nice colorless crystals in 2 to 3 days.

### 2.5. Single crystal X-ray diffraction

Single crystal X-ray diffraction data were collected on a Bruker D8 VENTURE CMOS X-ray

diffractometer with graphite monochromated Mo K $\alpha$  radiation ( $\lambda = 0.71073 \text{ \AA}$ ).

## 2.6. Gas chromatography

Head Space Gas Chromatography (HS-GC) Analysis: HS-GC measurements were carried out using an Agilent 7890B instrument with an FID detector and a DB-624 column (30 m  $\times$  0.53 mm  $\times$  3.0  $\mu$ m). Samples were analyzed using headspace injections and were performed by incubating the sample at 100  $^{\circ}$ C for 10 min followed by sampling 1 mL of the headspace. The following GC method was used: the oven was programmed from 50  $^{\circ}$ C, and ramped in 10  $^{\circ}$ C min $^{-1}$  increments to 150  $^{\circ}$ C with 15 min hold; the total run time was 25 min; the injection temperature was 250  $^{\circ}$ C; the detector temperature was 280  $^{\circ}$ C with nitrogen, air, and make-up flow rates of 35, 350, and 35 mL min $^{-1}$ , respectively; the helium (carrier gas) flow rate was 3.0 mL min $^{-1}$ . The samples were injected in the split mode (30:1).

## 2.7 Density functional theory (DFT) calculations

All calculations were performed by DFT using the B3LYP hybrid function combined with 6-31G(dp) basis set under Gaussian G09. Using single-crystal structures as input files, IGM analyses were carried out by Multiwfn 3.6 program through function 20 (visual study of weak interaction) and visualized using Visual Molecular Dynamics software.

## 3. Synthesis of hybrid[3]arene **H**

**Scheme S1.** Synthesis route to hybrid[3]arene

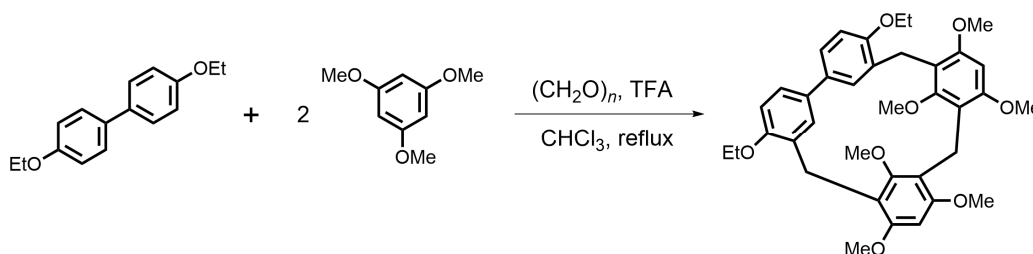

A mixture of 1 equiv. of 4,4'-biphenol diethyl ether, 2 equiv. of 1,3,5-trimethoxybenzene, 3 equiv. of paraformaldehyde, and a catalytic amount of trifluoroacetic acid (TFA) was refluxed in chloroform for 30 min. The reaction mixture was cooled to room temperature, and an excess of saturated aqueous Na<sub>2</sub>CO<sub>3</sub> was added to neutralize TFA. After purification by column chromatography, hybrid[3]arene was isolated in 28% yield as a white solid.

#### 4. Crystallography data

**Table S2.** Experimental single crystal X-ray data for ***oX@H***.

| Formula                                         | <b><i>oX@H</i></b>                                                           |
|-------------------------------------------------|------------------------------------------------------------------------------|
| Crystallization Solvent                         | <i>ortho</i> -xylene                                                         |
| Collection Temperature (K)                      | 170.0                                                                        |
| Formula                                         | C <sub>45</sub> H <sub>52</sub> O <sub>8</sub>                               |
| Formula Weight                                  | 720.86                                                                       |
| Crystal System                                  | Triclinic                                                                    |
| Space Group                                     | <i>P</i> -1                                                                  |
| <i>a</i> [Å]                                    | 10.9489(8)                                                                   |
| <i>b</i> [Å]                                    | 13.1954(8)                                                                   |
| <i>c</i> [Å]                                    | 15.6147(10)                                                                  |
| <i>α</i> [°]                                    | 110.605(3)                                                                   |
| <i>β</i> [°]                                    | 99.658(3)                                                                    |
| <i>γ</i> [°]                                    | 107.053(2)                                                                   |
| <i>V</i> [Å <sup>3</sup> ]                      | 1924.0(2)                                                                    |
| <i>Z</i>                                        | 2                                                                            |
| <i>D</i> <sub>calcd</sub> [g cm <sup>-3</sup> ] | 1.244                                                                        |
| Absorption coefficient (mm <sup>-1</sup> )      | 0.084                                                                        |
| <i>F</i> (000)                                  | 772                                                                          |
| Crystal size/mm <sup>3</sup>                    | 0.48 × 0.07 × 0.06                                                           |
| Radiation                                       | MoKα (λ = 0.71073)                                                           |
| Theta range/°                                   | 4.242 to 53.602                                                              |
| Index ranges                                    | -13 ≤ <i>h</i> ≤ 13, -16 ≤ <i>k</i> ≤ 16, -19 ≤ <i>l</i> ≤ 19                |
| Reflections collected                           | 8156                                                                         |
| Independent reflections                         | 8156 [ <i>R</i> <sub>int</sub> = 0.0779, <i>R</i> <sub>sigma</sub> = 0.0636] |
| Data/restraints/parameters                      | 8156/0/489                                                                   |
| CCDC                                            | 2214282                                                                      |

**Table S3.** Experimental single crystal X-ray data for *mX@H*.

| Formula                                         | <i>mX@H</i>                                                                  |
|-------------------------------------------------|------------------------------------------------------------------------------|
| Crystallization Solvent                         | <i>meta</i> -xylene                                                          |
| Collection Temperature (K)                      | C <sub>45</sub> H <sub>52</sub> O <sub>8</sub>                               |
| Formula                                         | 720.86                                                                       |
| Formula Weight                                  | 170.0                                                                        |
| Crystal System                                  | triclinic                                                                    |
| Space Group                                     | <i>P</i> -1                                                                  |
| <i>a</i> [Å]                                    | 10.8496(4)                                                                   |
| <i>b</i> [Å]                                    | 13.1599(5)                                                                   |
| <i>c</i> [Å]                                    | 15.6652(7)                                                                   |
| $\alpha$ [°]                                    | 109.8910(10)                                                                 |
| $\beta$ [°]                                     | 97.3970(10)                                                                  |
| $\gamma$ [°]                                    | 105.8220(10)                                                                 |
| <i>V</i> [Å <sup>3</sup> ]                      | 1961.96(14)                                                                  |
| <i>Z</i>                                        | 2                                                                            |
| <i>D</i> <sub>calcd</sub> [g cm <sup>-3</sup> ] | 1.220                                                                        |
| Adsorption coefficient (mm <sup>-1</sup> )      | 0.083                                                                        |
| <i>F</i> (000)                                  | 772.0                                                                        |
| Crystal size/mm <sup>3</sup>                    | 0.48 × 0.21 × 0.2                                                            |
| Radiation                                       | MoK $\alpha$ ( $\lambda$ = 0.71073)                                          |
| Theta range/°                                   | 4.978 to 54.286                                                              |
| Index ranges                                    | -13 ≤ <i>h</i> ≤ 13, -16 ≤ <i>k</i> ≤ 16, -20 ≤ <i>l</i> ≤ 20                |
| Reflections collected                           | 41841                                                                        |
| Independent reflections                         | 8662 [ <i>R</i> <sub>int</sub> = 0.0396, <i>R</i> <sub>sigma</sub> = 0.0348] |
| Data/restraints/parameters                      | 8662/0/488                                                                   |
| CCDC                                            | 2214284                                                                      |

5. Characterization of nonporous adaptive crystals of **H** (**H $\alpha$** )

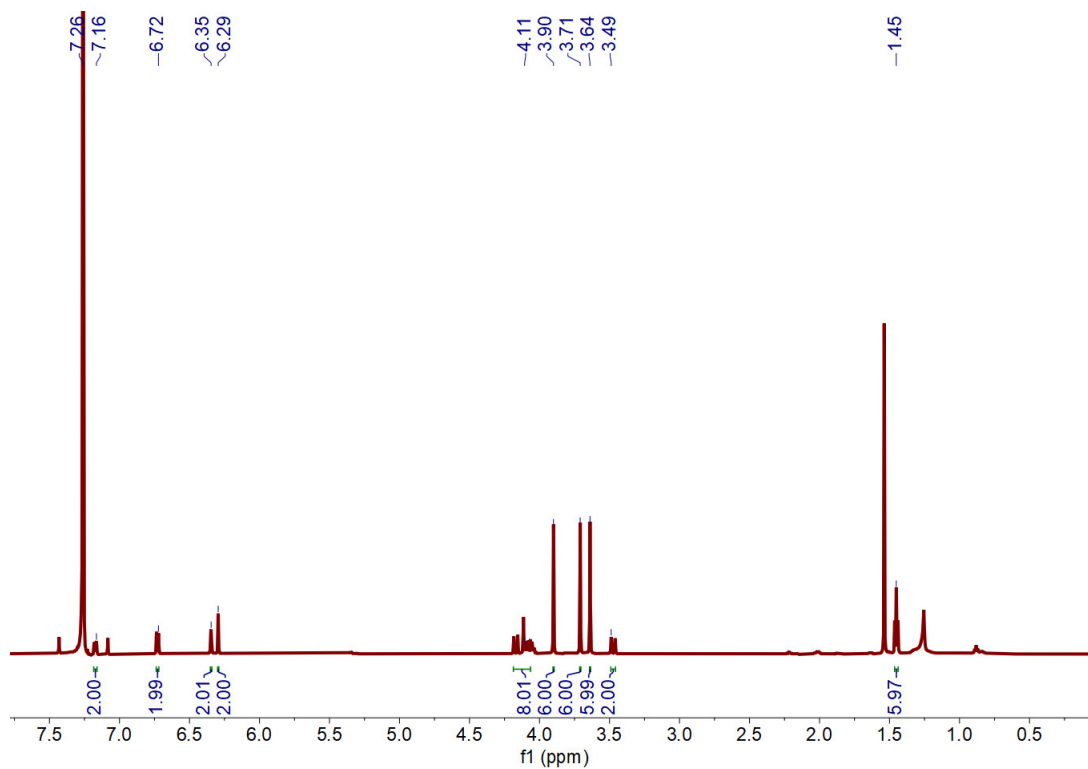

**Fig. S1.** <sup>1</sup>H NMR spectrum (600 MHz, CDCl<sub>3</sub>, 293 K) of **H $\alpha$** .

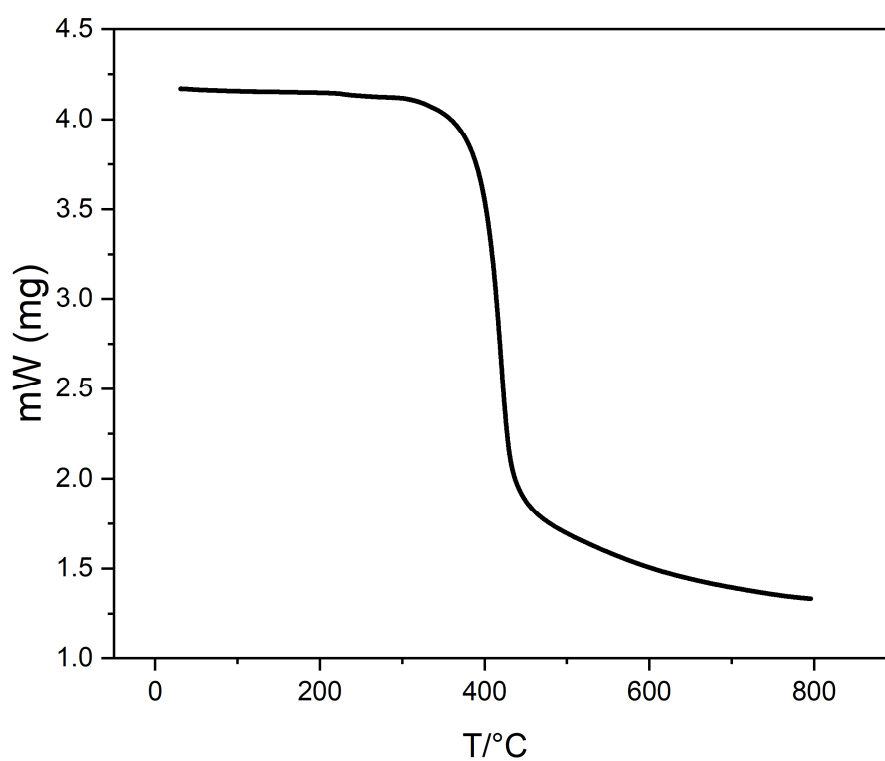

**Fig. S2.** Thermogravimetric analysis of **H $\alpha$** .

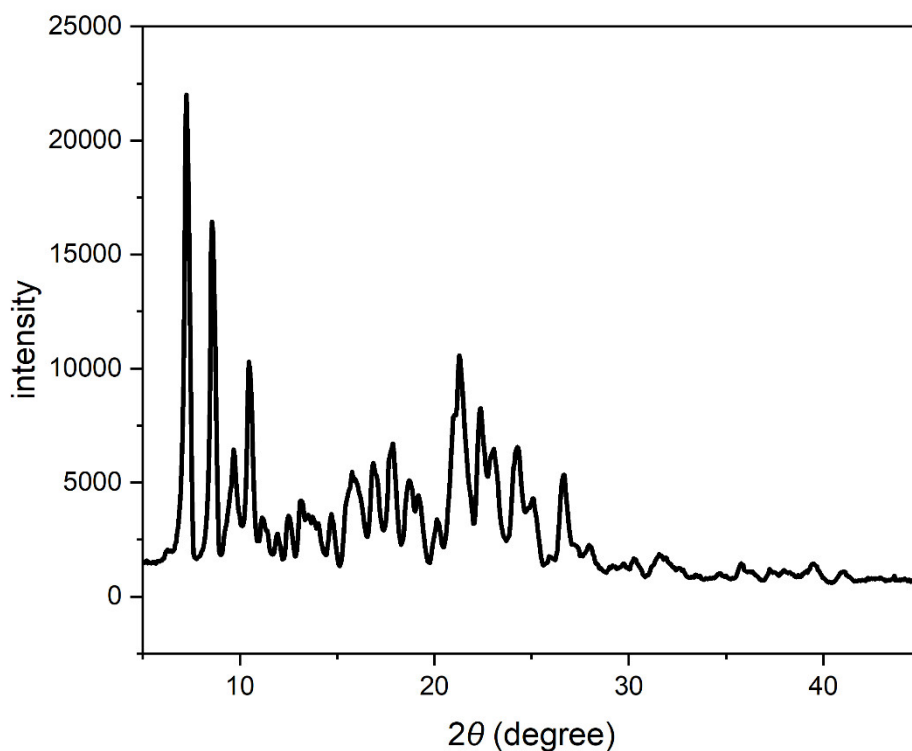

**Fig. S3.** Powder X-ray diffraction pattern of **H $\alpha$** .

*6. Adsorption experiments of **H $\alpha$**  for single-component xylene isomers*

$^1\text{H}$  NMR experiments were performed by dissolving **H $\alpha$**  after adsorption of single-component xylene isomers vapors in  $\text{CDCl}_3$ . TGA profiles were recorded using **H $\alpha$**  after adsorption of single-component xylene isomers vapors.

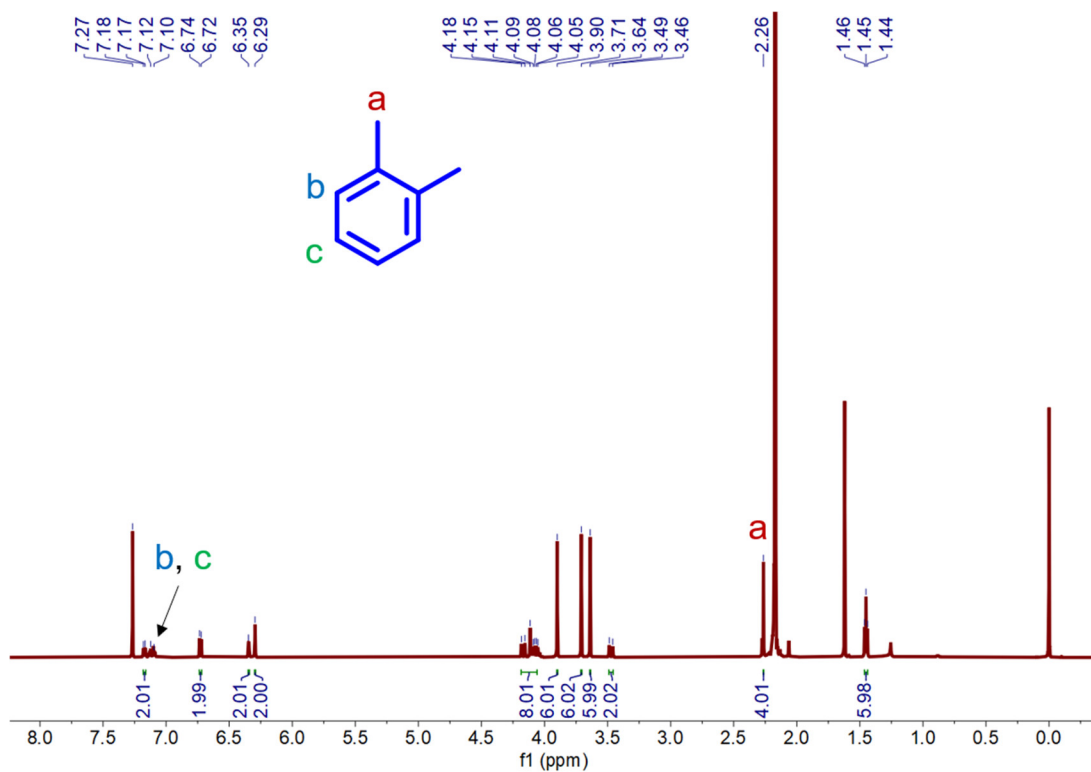

Fig. S4. <sup>1</sup>H NMR spectrum (600 MHz, CDCl<sub>3</sub>, 293 K) of **H $\alpha$**  after adsorption of *o*X vapor for 12 h.

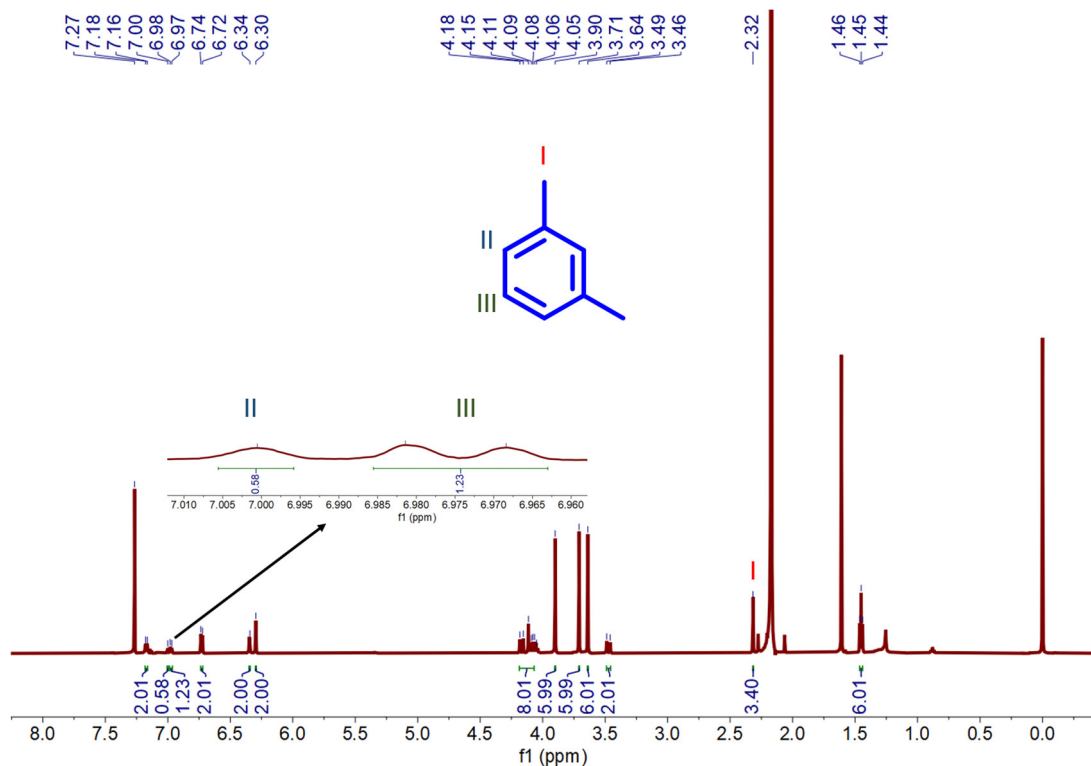

Fig. S5. <sup>1</sup>H NMR spectrum (600 MHz, CDCl<sub>3</sub>, 293 K) of **H $\alpha$**  after adsorption of *m*X vapor for 12 h.



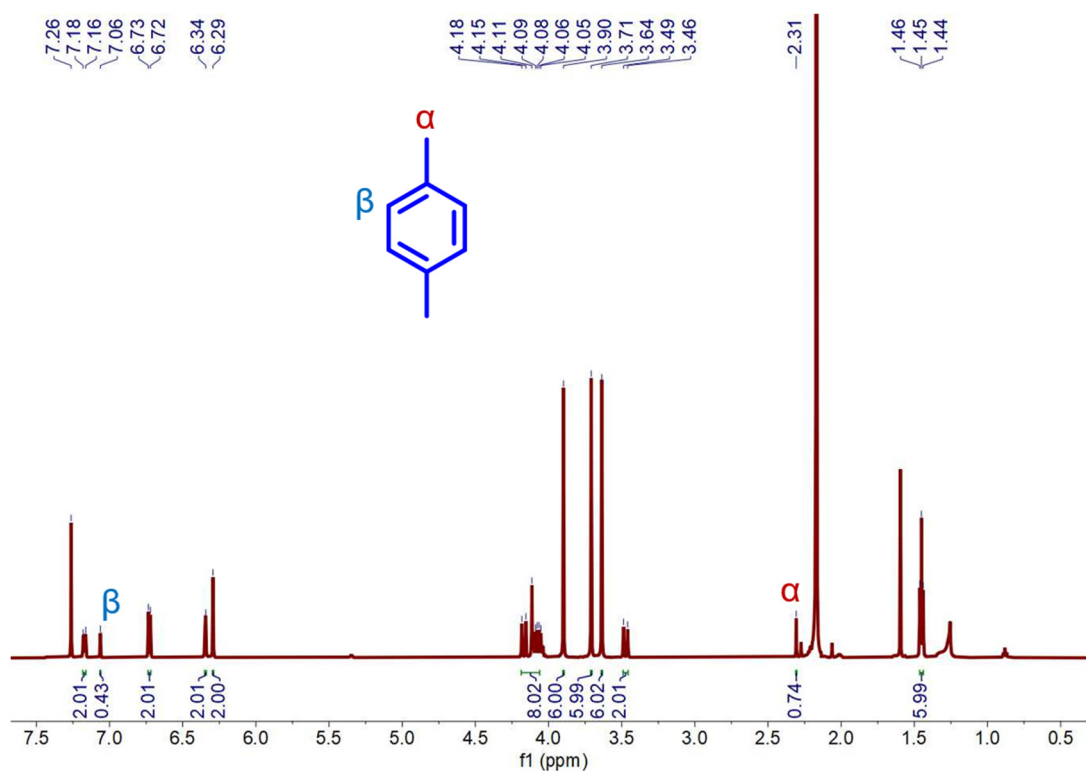

Fig. S6.  $^1\text{H}$  NMR spectrum (600 MHz,  $\text{CDCl}_3$ , 293 K) of  $\text{H}\alpha$  after adsorption of  $p\text{X}$  vapor for 12 h.

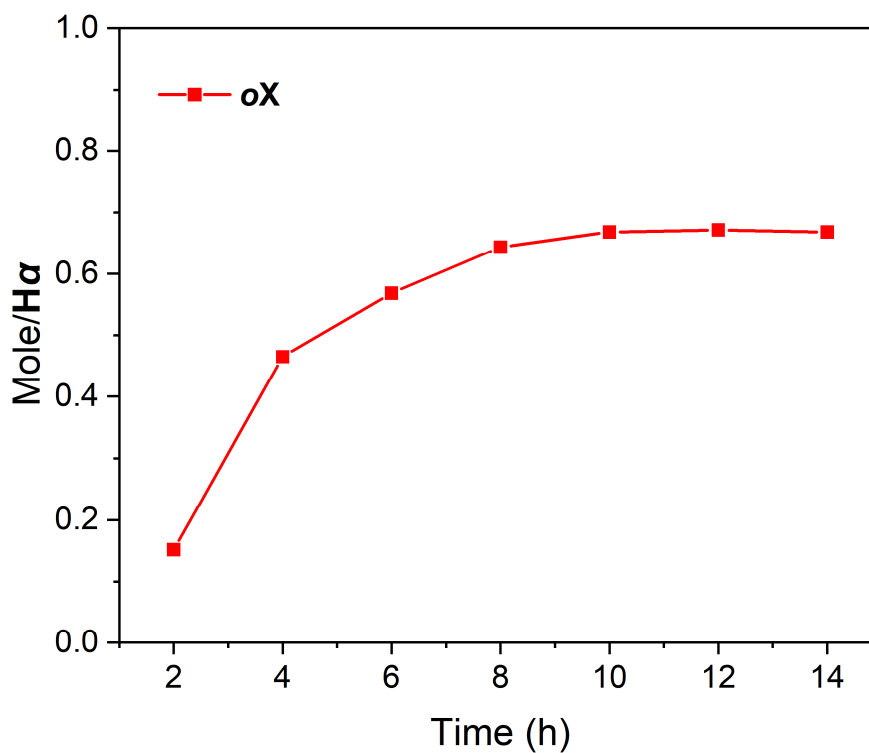

Fig. S7. Time-dependent vapor-solid adsorption plots of  $\text{H}\alpha$  for single-component  $o\text{X}$  vapor.

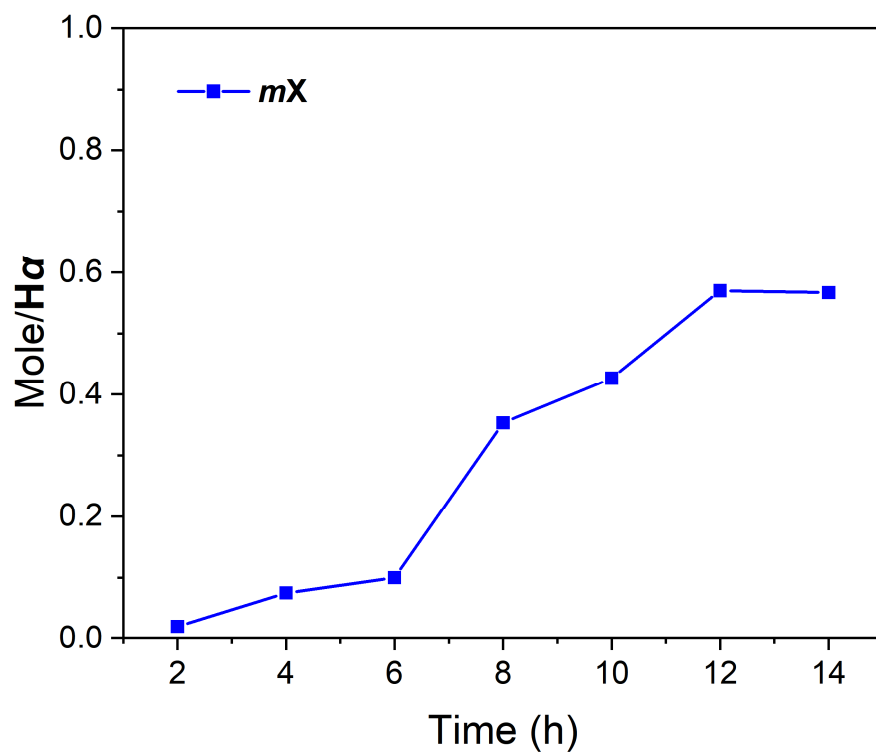

Fig. S8. Time-dependent vapor–solid adsorption plots of  $H\alpha$  for single-component *mX* vapor.

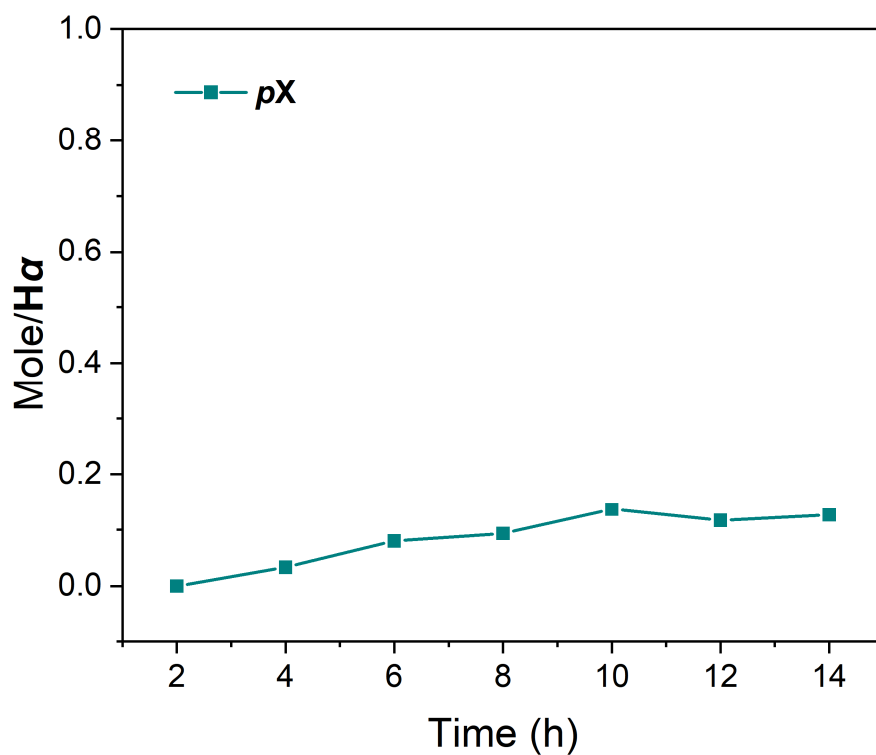

Fig. S9. Time-dependent vapor–solid adsorption plots of  $H\alpha$  for single-component *pX* vapor.

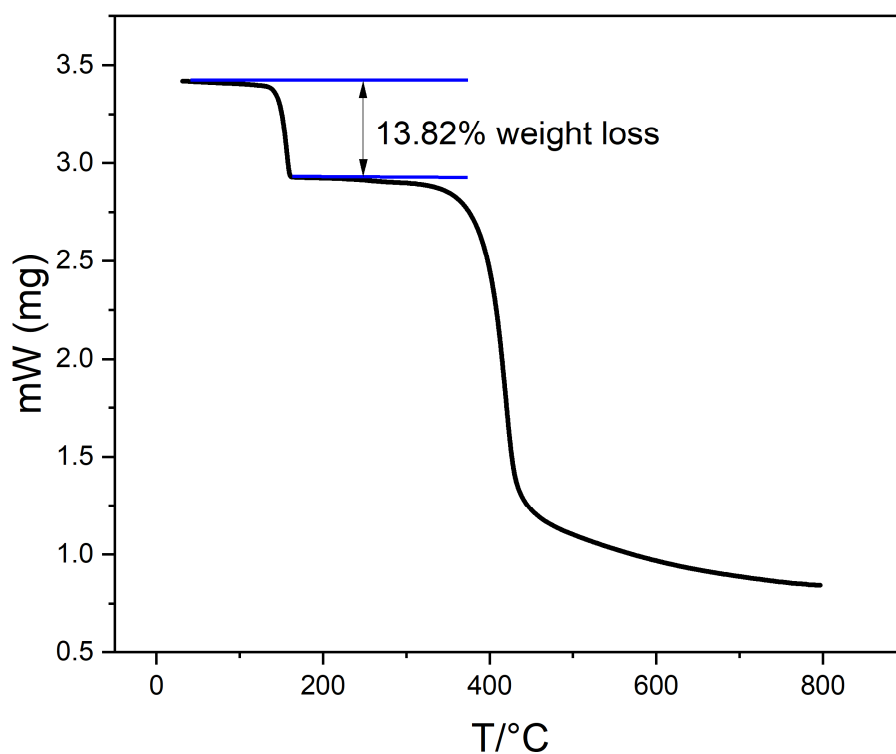

**Fig. S10.** Thermogravimetric analysis of **Ha** after adsorption of **oX** vapor for 12 h. The weight loss at 150 °C can be calculated as 0.9 **oX** molecule per **Ha** molecule.

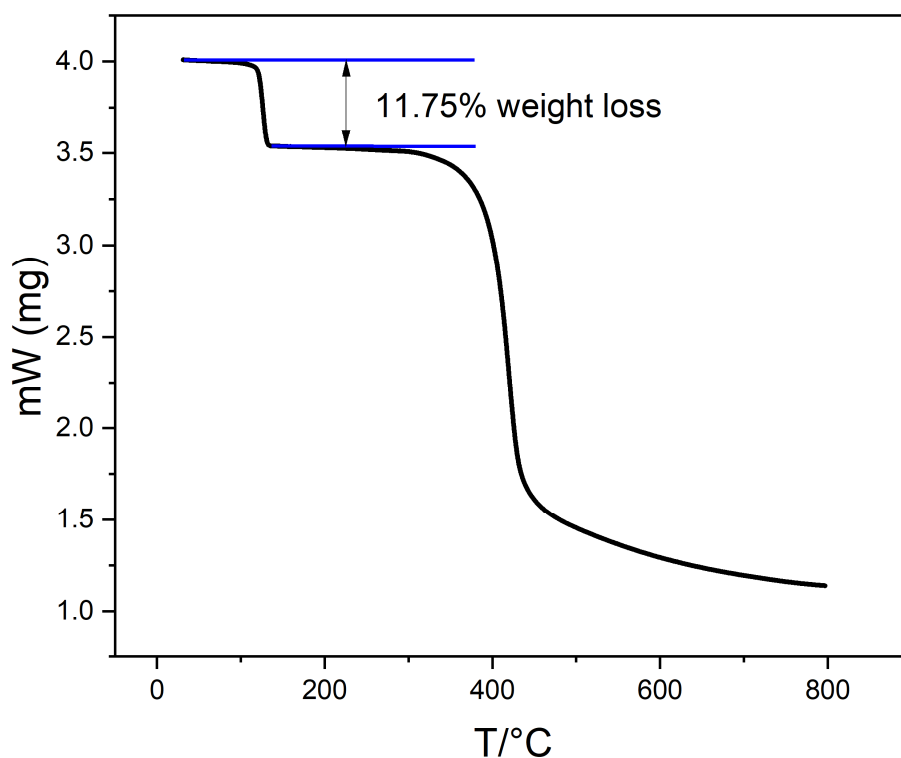

**Fig. S11.** Thermogravimetric analysis of **Ha** after adsorption of **mX** vapor for 12 h. The weight loss at 150 °C can be calculated as 0.8 **mX** molecule per **Ha** molecule.

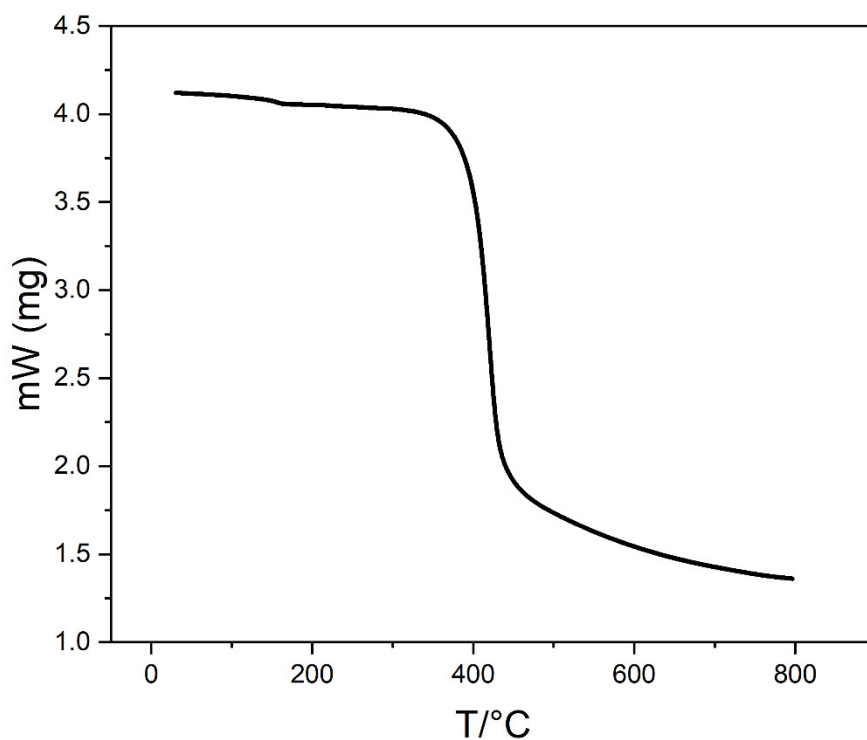

**Fig. S12.** Thermogravimetric analysis of **H $\alpha$**  after adsorption of **pX** vapor for 12 h.

### 7. Noncovalent interactions analysis in single crystal structures of host–guest complexes

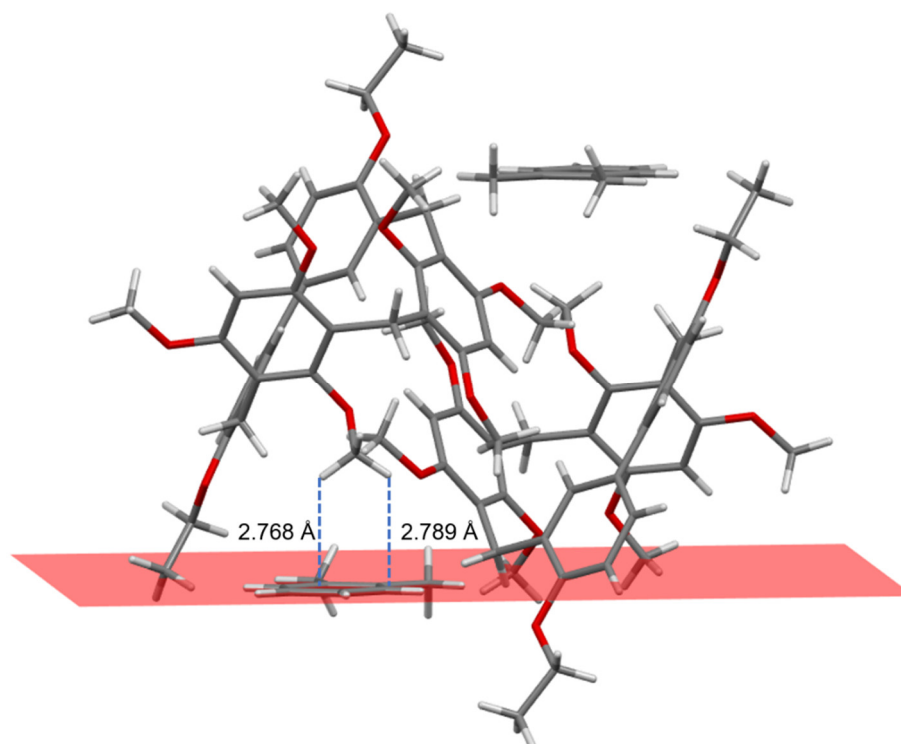

**Fig. S13.** Single crystal of ***oX*@H**: illustration of C–H $\cdots\pi$  interaction between two hydrogen atoms on the methyl group of **H** and the benzene ring of ***oX***, the distances between hydrogen atoms and benzene ring were 2.768 Å and 2.789 Å.

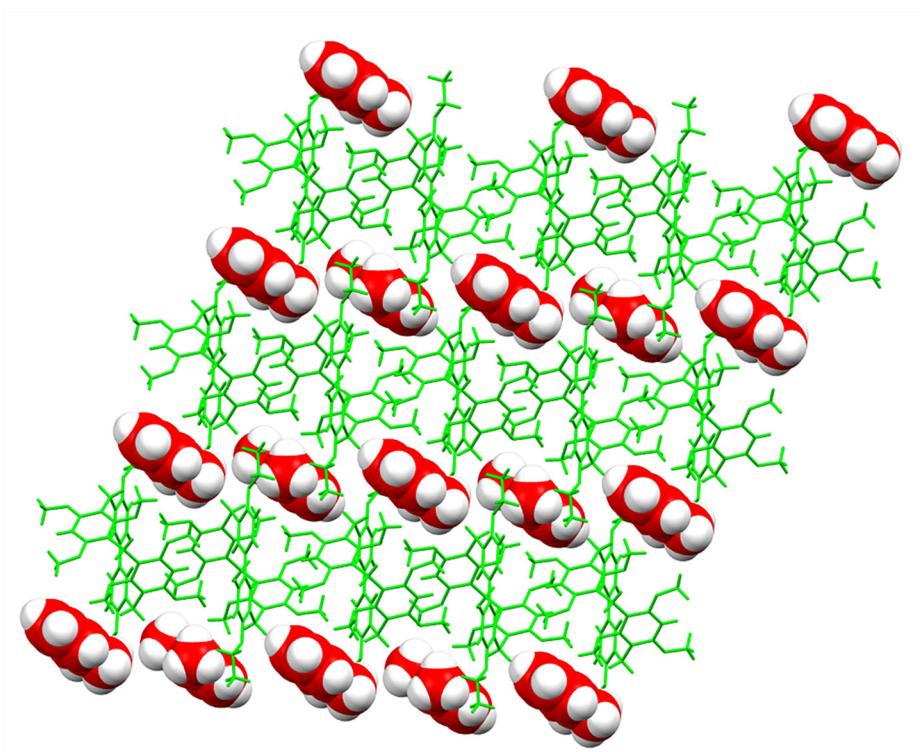

**Fig. S14.** Single crystal of  $oX@H$ ,  $oX$  molecules were in the channels formed by  $H$ .

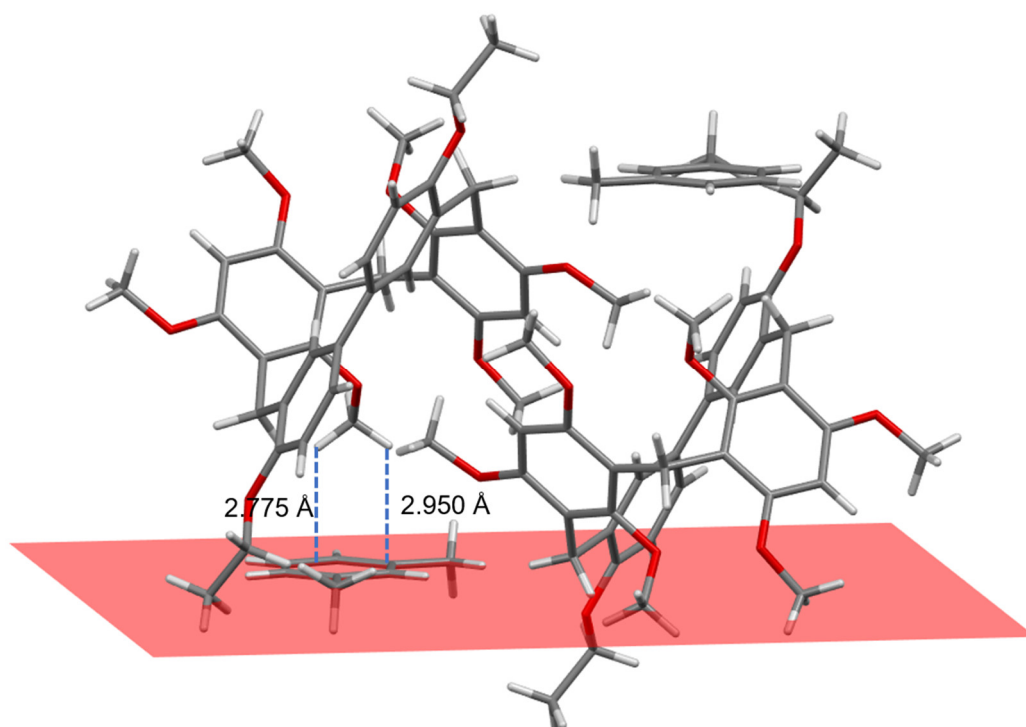

**Fig. S15.** Single crystal of  $mX@H$ : illustration of  $C-H \cdots \pi$  interaction between two hydrogen atoms on the methyl group of  $H$  and the benzene ring of  $mX$ , the distances between hydrogen atoms and benzene ring were 2.775 Å and 2.950 Å.

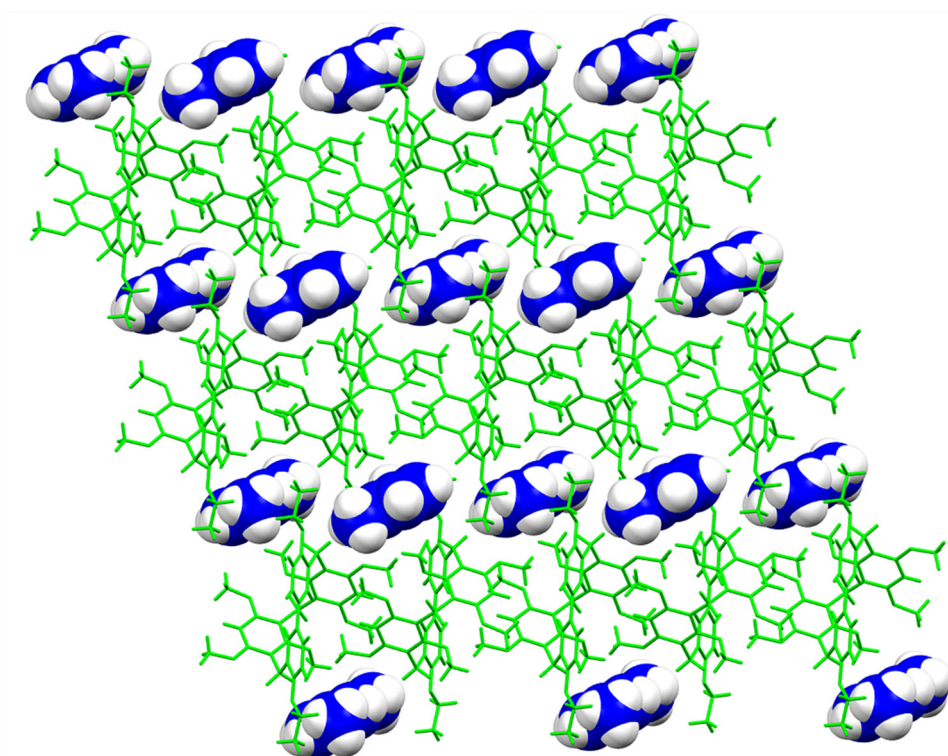

**Fig. S16.** Single crystal of  $mX@H$ ,  $mX$  molecules were in the channels formed by **H**.

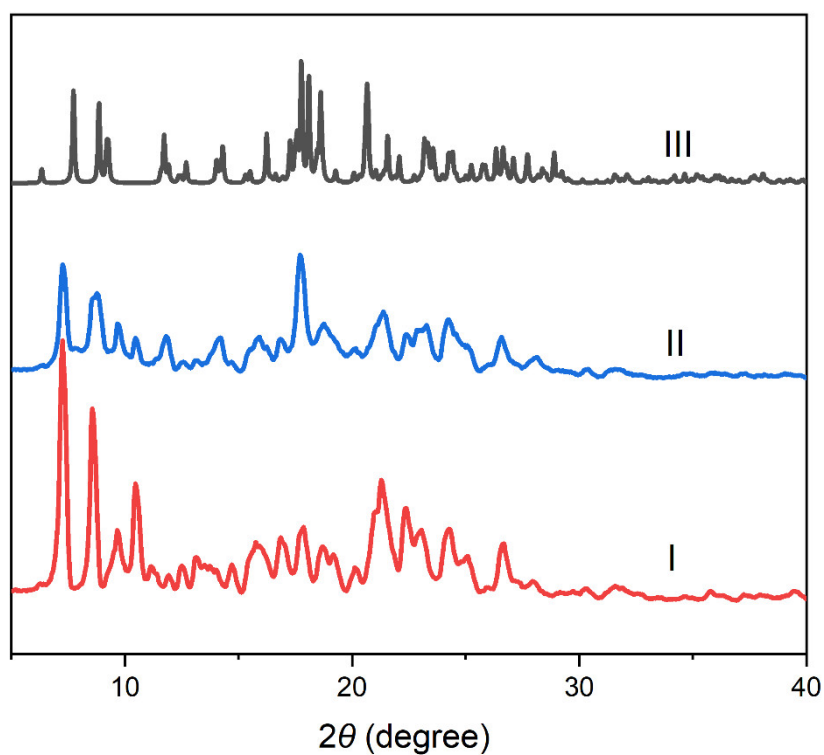

**Fig. S17.** PXRD patterns of **H $\alpha$** : (I) original **H $\alpha$** ; (II) **H $\alpha$**  after adsorption of  $oX$  vapor; (III) simulated from single crystal of  $oX@H$ .

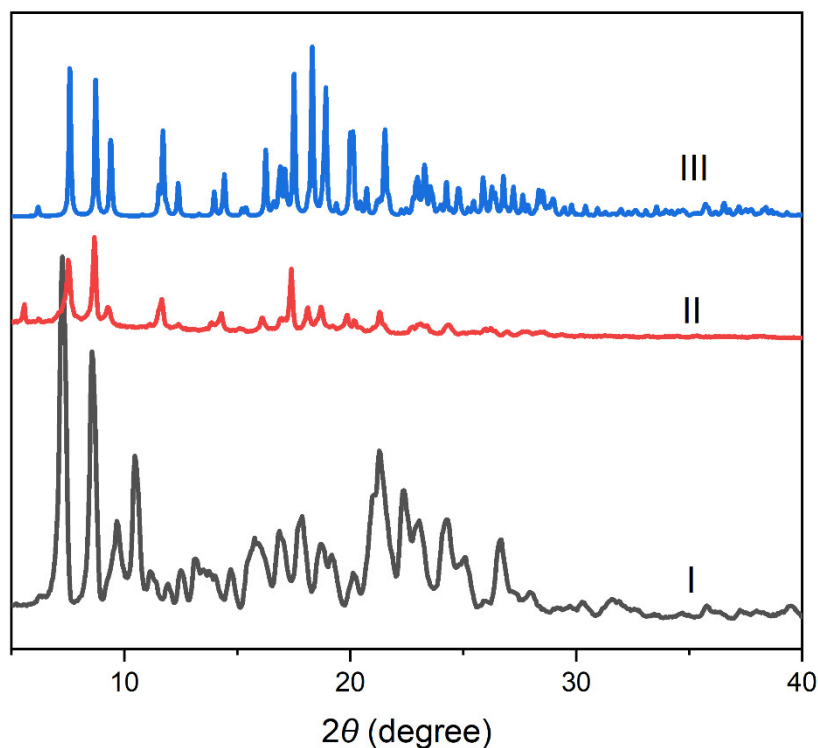

**Fig. S18.** PXRD patterns of **Ha**: (I) original **Ha**; (II) **Ha** after adsorption of **mX** vapor; (III) simulated from single crystal of **mX@H**.

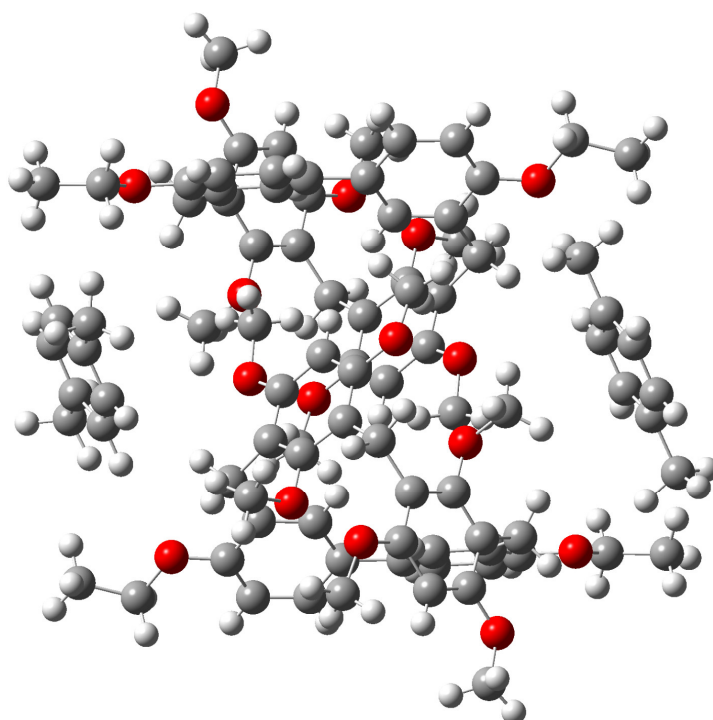

**Fig. S19.** Structure of **pX@H** based on DFT calculation.

#### 8. Uptake from the binary mixture of xylene isomers by **Ha**

An open 5 mL vial containing 2.00 mg of guest-free **Ha** was placed in a sealed 20 mL vial containing 1 mL of the mixture of **oX** and **mX** ( $v:v = 1:1$ ). Uptake in **Ha** was measured hour by hour by completely dissolving the crystals and measuring the ratio of **oX** or **mX** to **Ha** by  $^1\text{H}$  NMR. The relative uptakes of **oX**

and *mX* vapors in **H<sub>a</sub>** were also measured by heating the crystals to release the adsorbed vapor and detecting the relative amounts of *oX* and *mX* in the released vapor using head space gas chromatography.

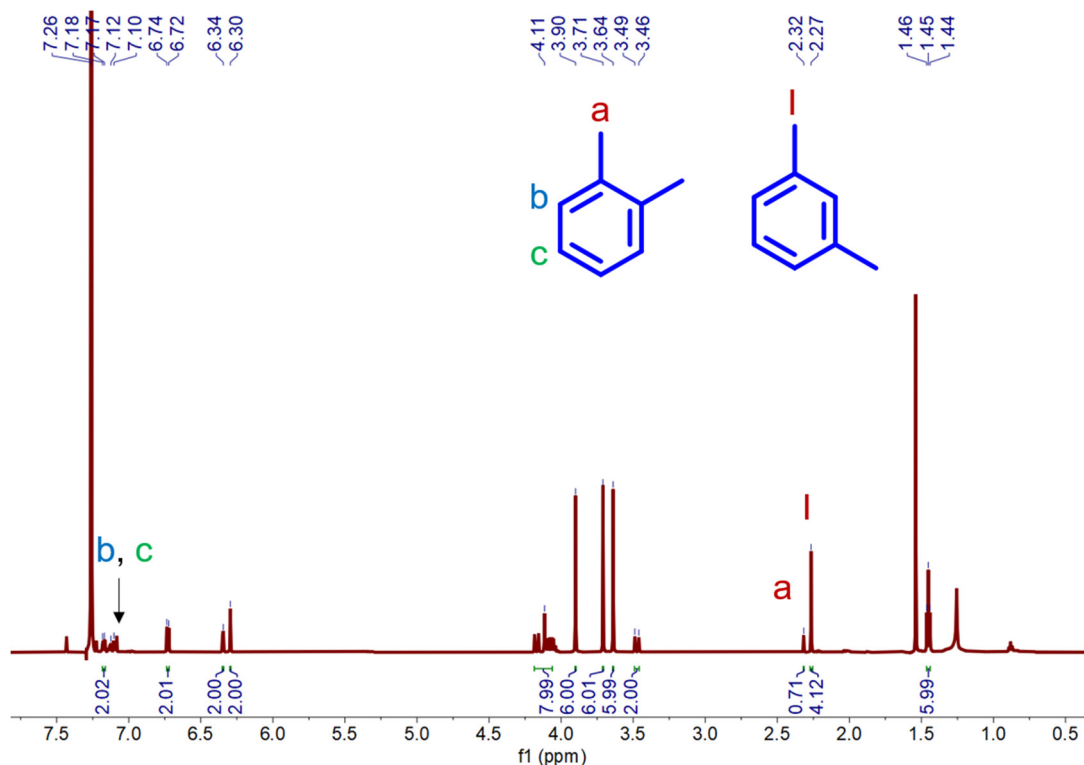

**Fig. S20.** <sup>1</sup>H NMR spectrum (600 MHz, CDCl<sub>3</sub>, 293 K) of **H<sub>a</sub>** after adsorption of the mixture of *oX*/*mX* (*v*:*v* = 1:1) vapor for 12 h.

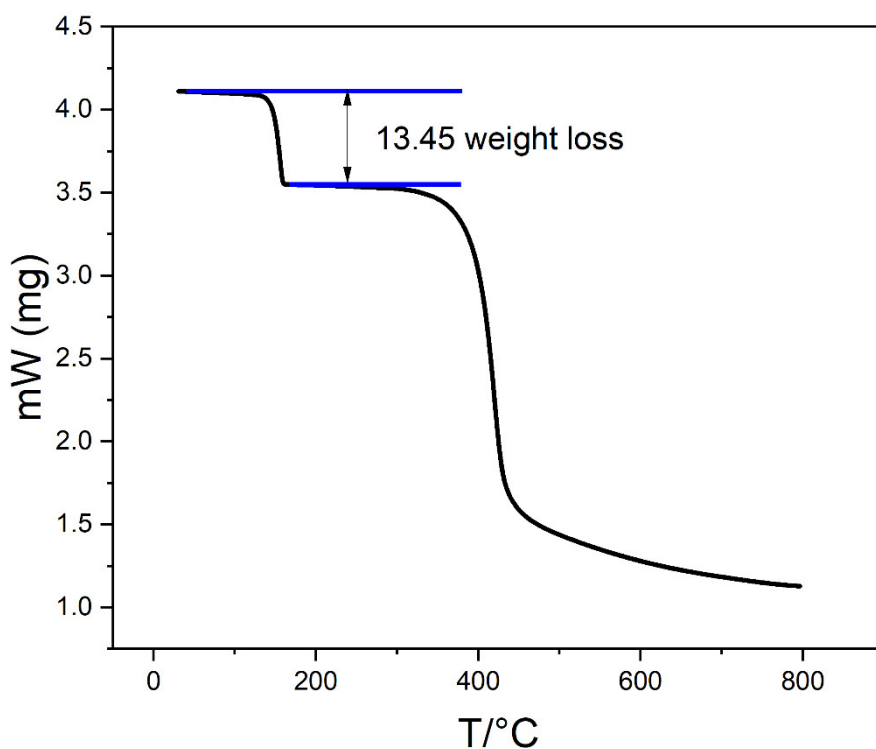

**Fig. S21.** Thermogravimetric analysis of **H** after sorption of the vapor mixture of *oX* and *mX* for 14 h. The weight loss at 150 °C can be calculated as 0.9 *oX* molecule per **H** molecule.



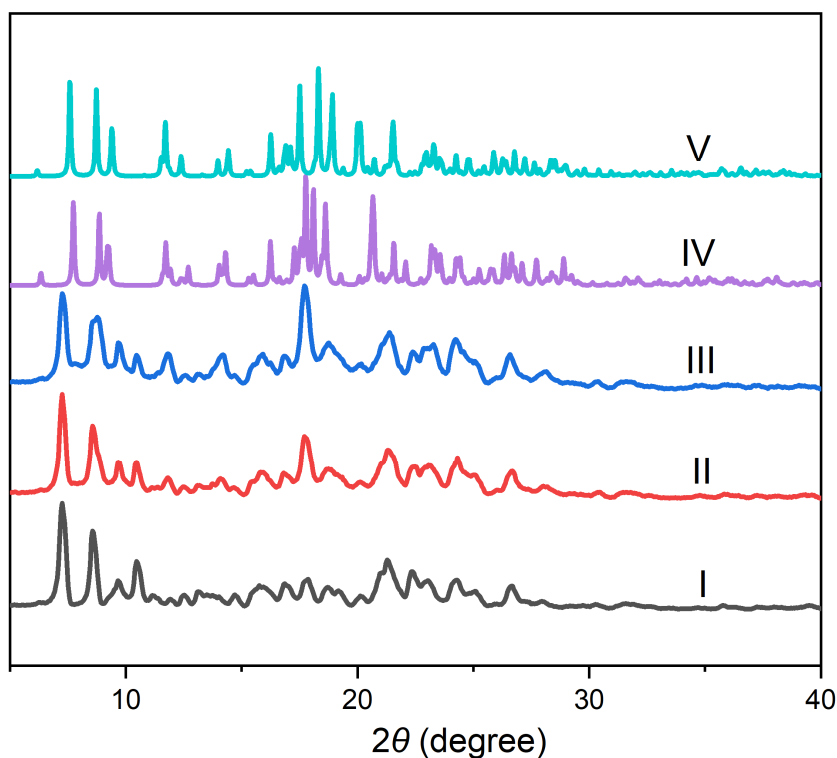

**Fig. 22.** PXRD patterns of **H $\alpha$** : (I) original **H $\alpha$** ; (II) **H $\alpha$**  after adsorption of the mixture of ***o*X** and ***p*X**; (III) **H $\alpha$**  after adsorption of ***o*X**; (IV) simulated from single crystal of ***o*X@H**; (V) simulated from single crystal of ***m*X@H**.

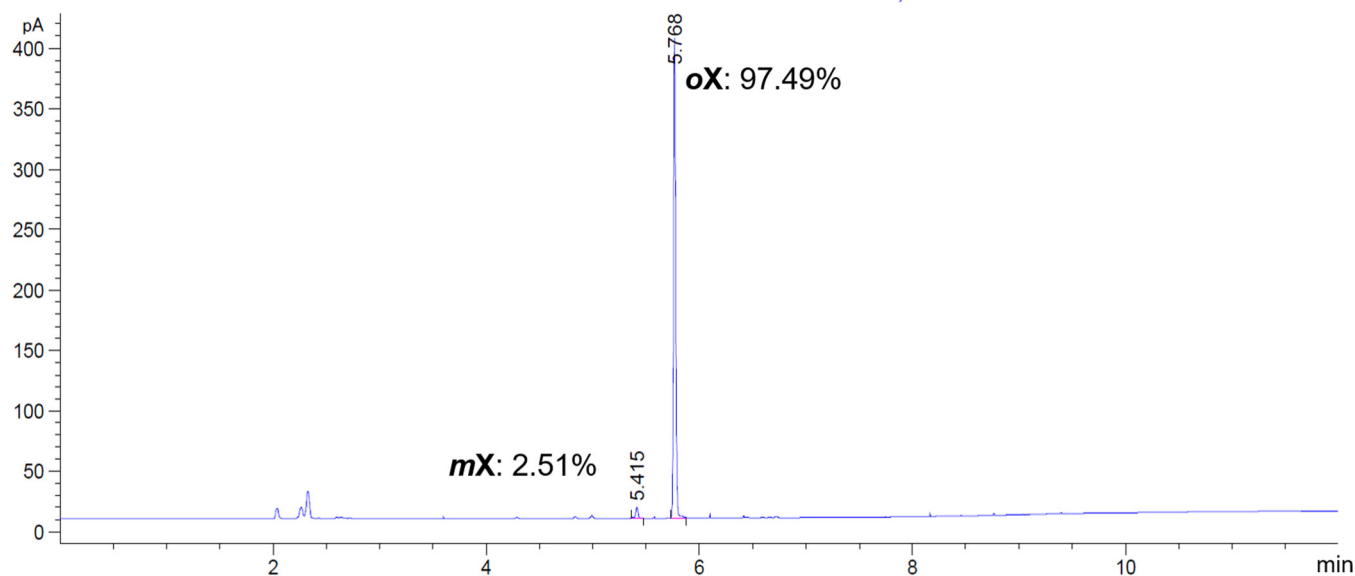

**Fig. S23.** Relative uptakes of ***o*X** and ***m*X** vapors adsorbed by **H $\alpha$**  for 12 h using head space gas chromatography.

An open 5 mL vial containing 2.00 mg of guest-free **H $\alpha$**  was placed in a sealed 20 mL vial containing 1 mL of the vapor mixture of ***o*X** and ***p*X** ( $v:v = 1:1$ ). Uptake in **H $\alpha$**  was measured hour by hour by completely dissolving the crystals and measuring the ratio of ***o*X** or ***p*X** vapor to **H $\alpha$**  by  $^1\text{H}$  NMR. The

relative uptakes of *o*X and *p*X vapors by **H $\alpha$**  were measured by heating the crystals to release the adsorbed vapor and detecting the relative amounts of *o*X and *p*X in the released vapor using head space gas chromatography.

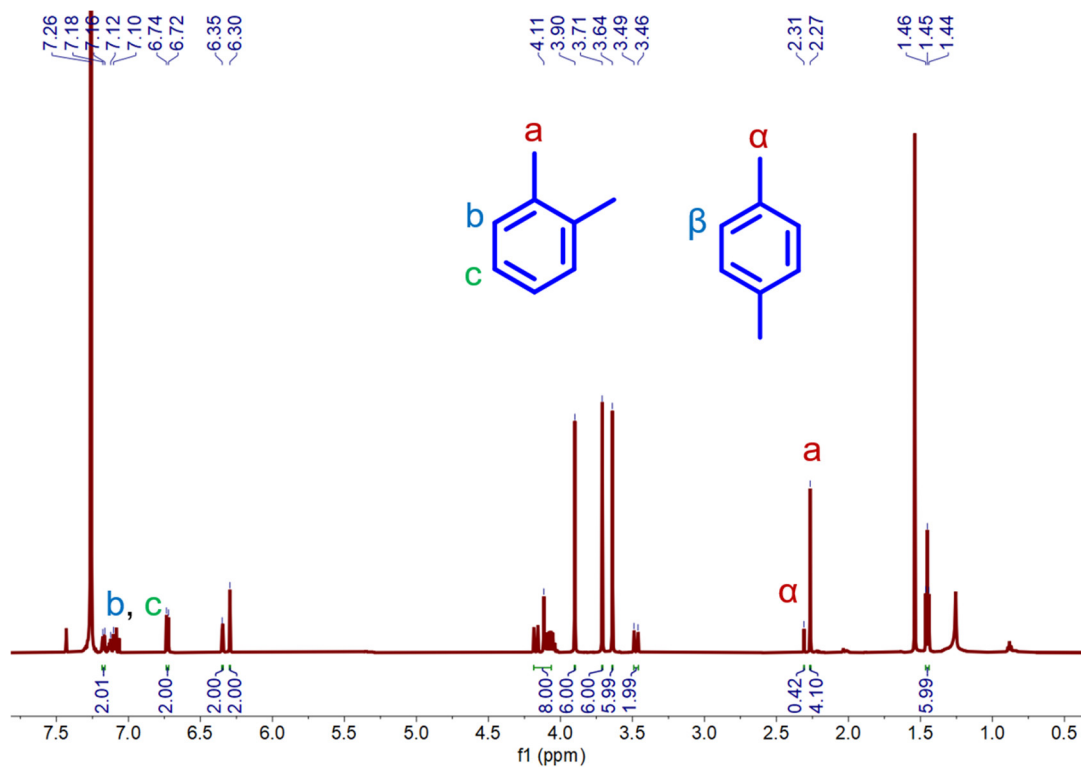

**Fig. S24.** <sup>1</sup>H NMR spectrum (600 MHz, CDCl<sub>3</sub>, 293 K) of **H $\alpha$**  after adsorption of the mixture of *o*X/*p*X (*v*:*v* = 1:1) for 12 h.

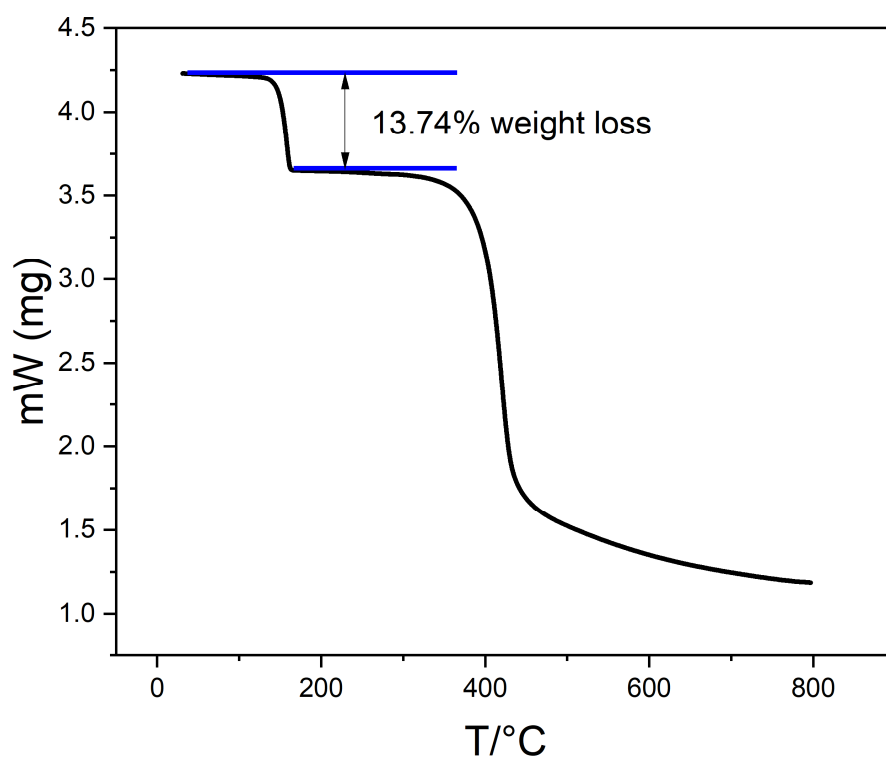

**Fig. S25.** Thermogravimetric analysis of **H $\alpha$**  after adsorption of the vapor mixture of ***o*X** and ***p*X** for 14 h. The weight loss below 200 °C can be calculated as 0.9 ***o*X** molecule per **H** molecule.

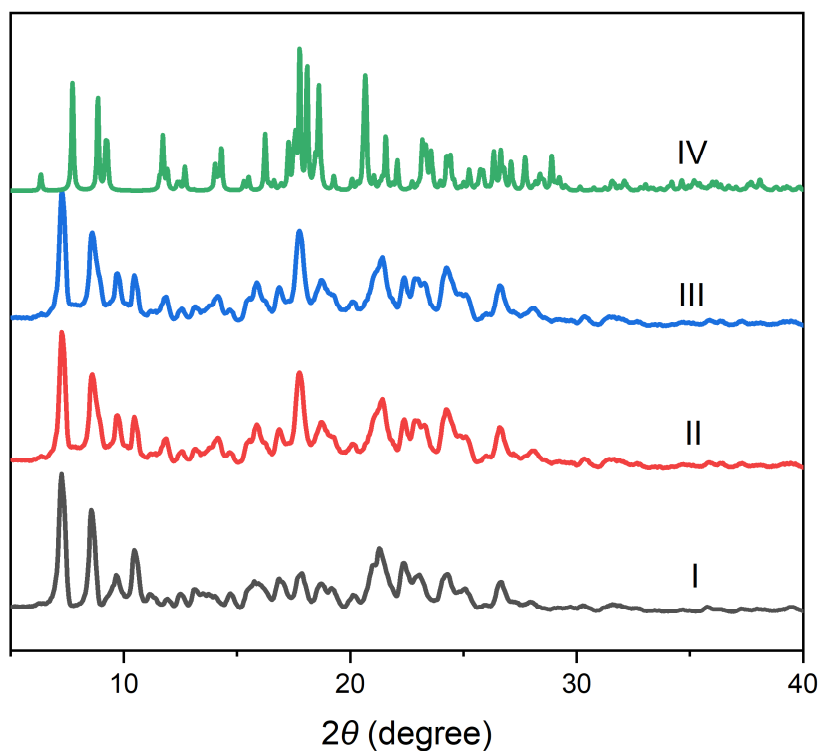

**Fig. S26.** PXRD patterns of **H $\alpha$** : (I) original **H $\alpha$** ; (II) **H $\alpha$**  after adsorption of the mixture of ***o*X** and ***p*X**; (III) **H $\alpha$**  after adsorption of ***o*X**; (IV) simulated from single crystal of ***o*X@H**.

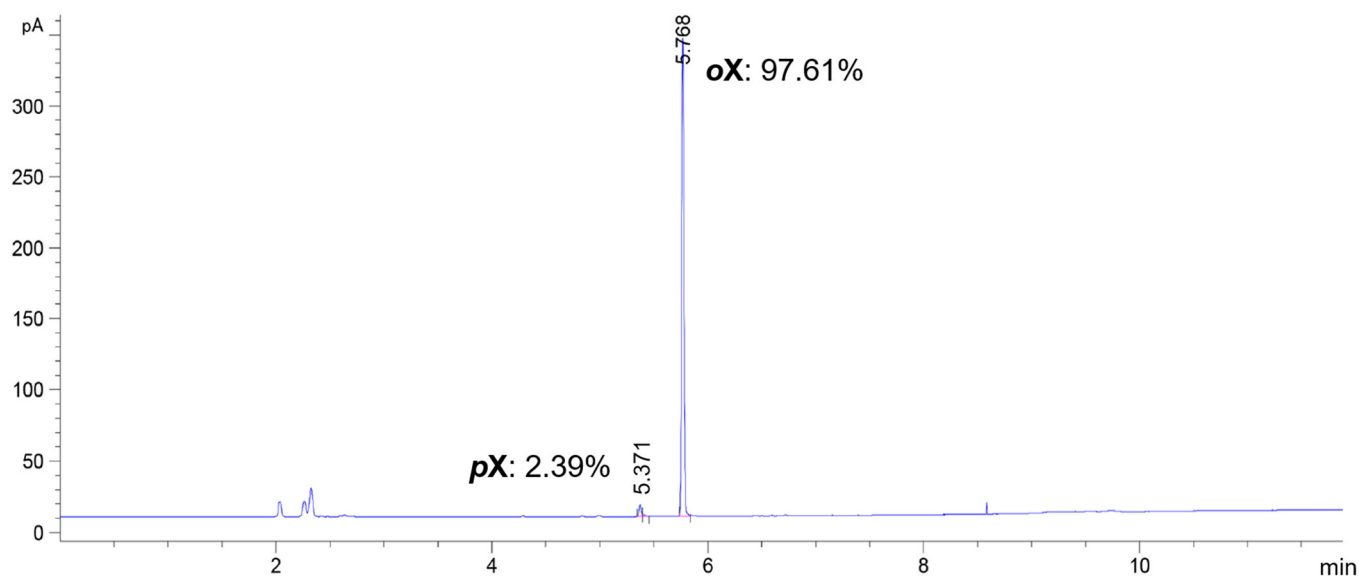

**Fig. S27.** Relative uptakes of *oX* and *pX* adsorbed in **Ha** for 12 h using head space gas chromatography.

An open 5 mL vial containing 2.00 mg of guest-free **Ha** was placed in a sealed 20 mL vial containing 1 mL of the vapor mixture of *mX* and *pX* (*v:v* = 1:1). Uptake in **Ha** was measured hour by hour by completely dissolving the crystals and measuring the ratio of *mX* or *pX* to **Ha** by  $^1\text{H}$  NMR.

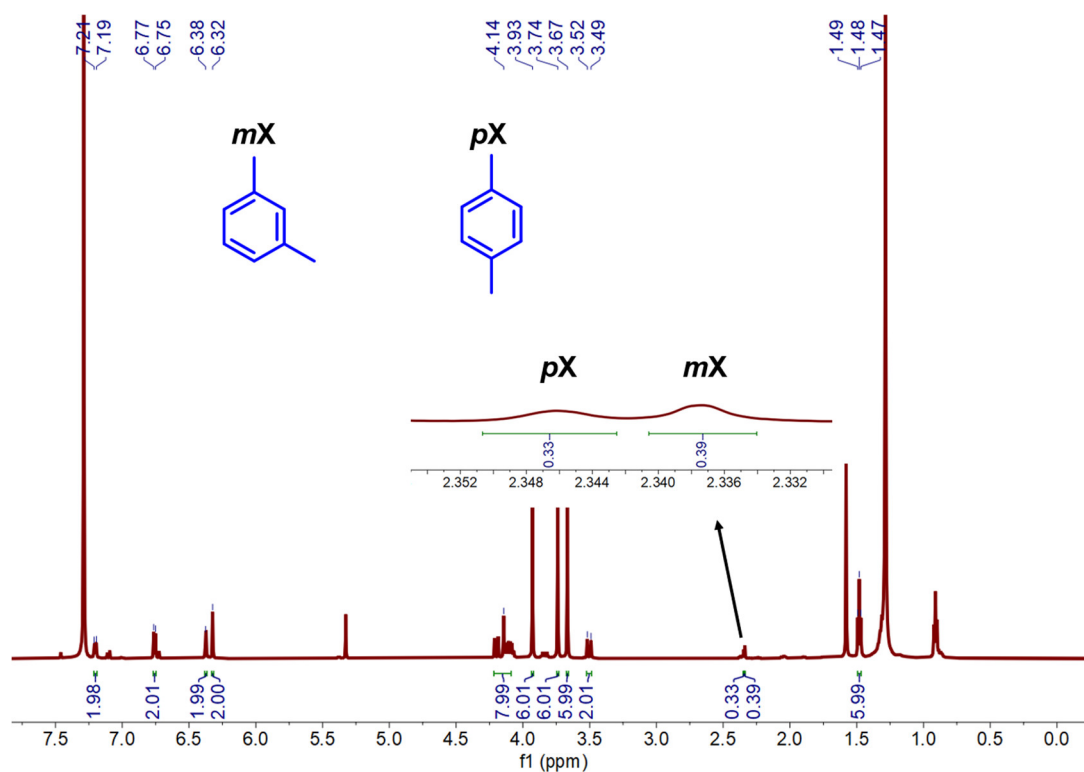

**Fig. S28.**  $^1\text{H}$  NMR spectrum (600 MHz,  $\text{CDCl}_3$ , 293 K) of **Ha** after adsorption of the vapor mixture of *mX* and *pX* (*v:v* = 1:1) for 12 h.

### 9. Uptake from the ternary mixture of xylene isomers by **H $\alpha$**

An open 5 mL vial containing 2.00 mg of guest-free **H $\alpha$**  was placed in a sealed 20 mL vial containing 1 mL of the mixture of **oX/pX** (v:v = 1:1). Uptake in **H $\alpha$**  was measured hour by hour by completely dissolving the crystals and measuring the ratio of **oX** or **pX** to **H $\alpha$**  by  $^1\text{H}$  NMR. The relative uptakes of **oX** and **pX** in **H $\alpha$**  were measured by heating the crystals to release the adsorbed vapor and detecting the relative amounts of **oX** and **pX** in the released vapor using head space gas chromatography.

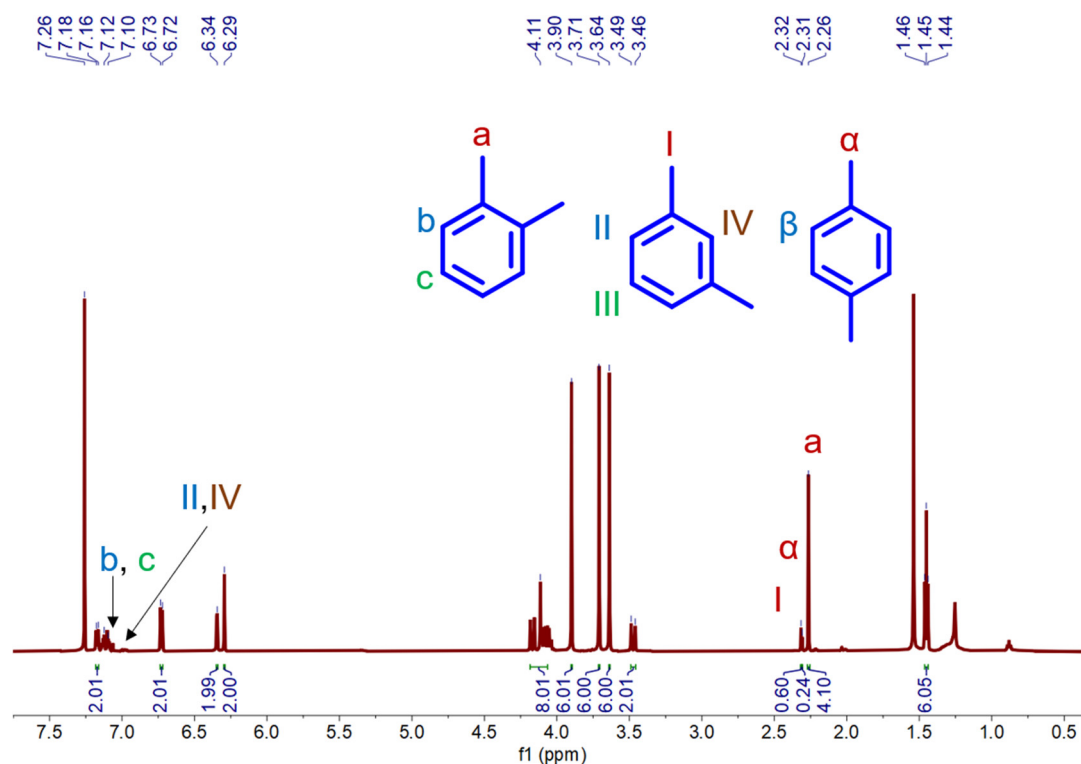

**Fig. S29.**  $^1\text{H}$  NMR spectrum (600 MHz,  $\text{CDCl}_3$ , 293 K) of **H $\alpha$**  after adsorption of the ternary vapor mixture (**oX**:**mX**:**pX**, v:v:v = 1:1:1) for 12 h.

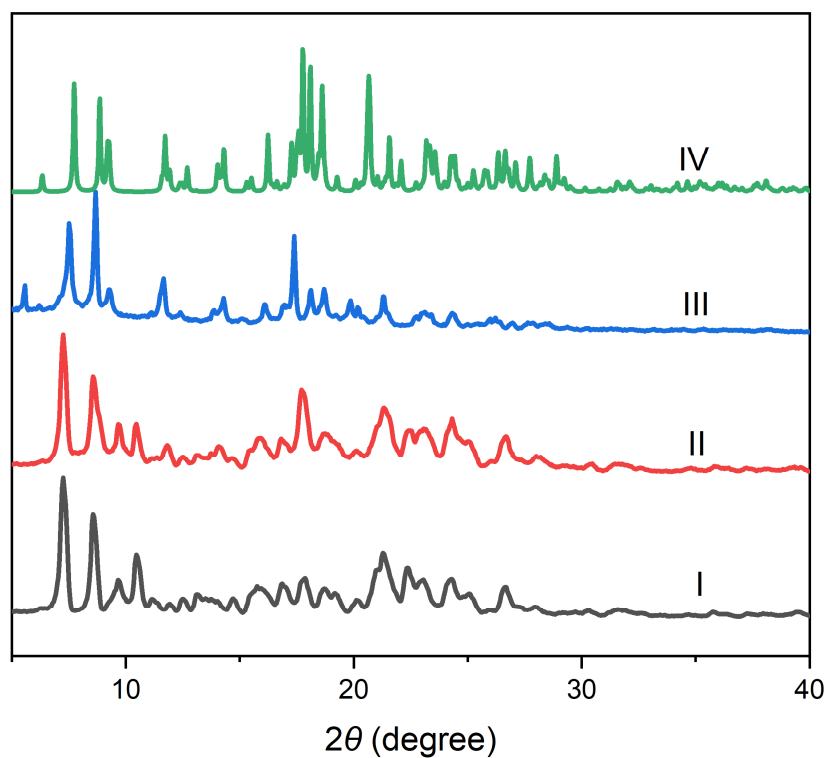

**Fig. S30.** PXRD patterns of **H $\alpha$** : (I) original **H $\alpha$** ; (II) **H $\alpha$**  after adsorption of the ternary vapor mixture (***oX:mX:pX***,  $v:v:v = 1:1:1$ ); (III) **H $\alpha$**  after adsorption of ***oX@H***; (IV) simulated from single crystal of ***oX@H***.

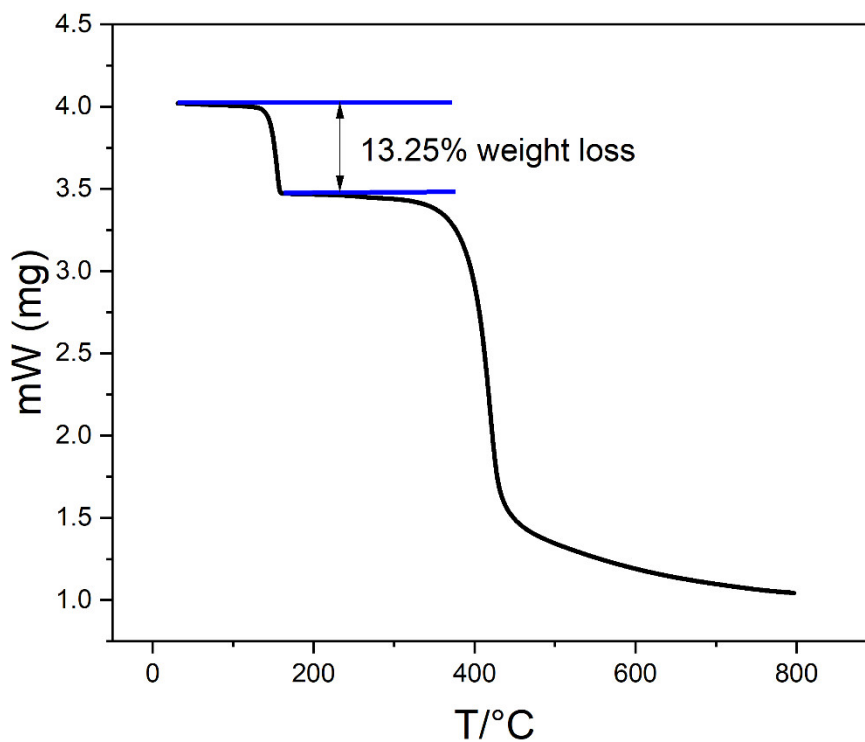

**Fig. S31.** Thermogravimetric analysis of **H** after adsorption of the ternary vapor mixture (***oX:mX:pX***,  $v:v:v = 1:1:1$ ) for 14 h. The weight loss below 200 °C can be calculated as 0.9 ***oX*** molecule per **H** molecule.

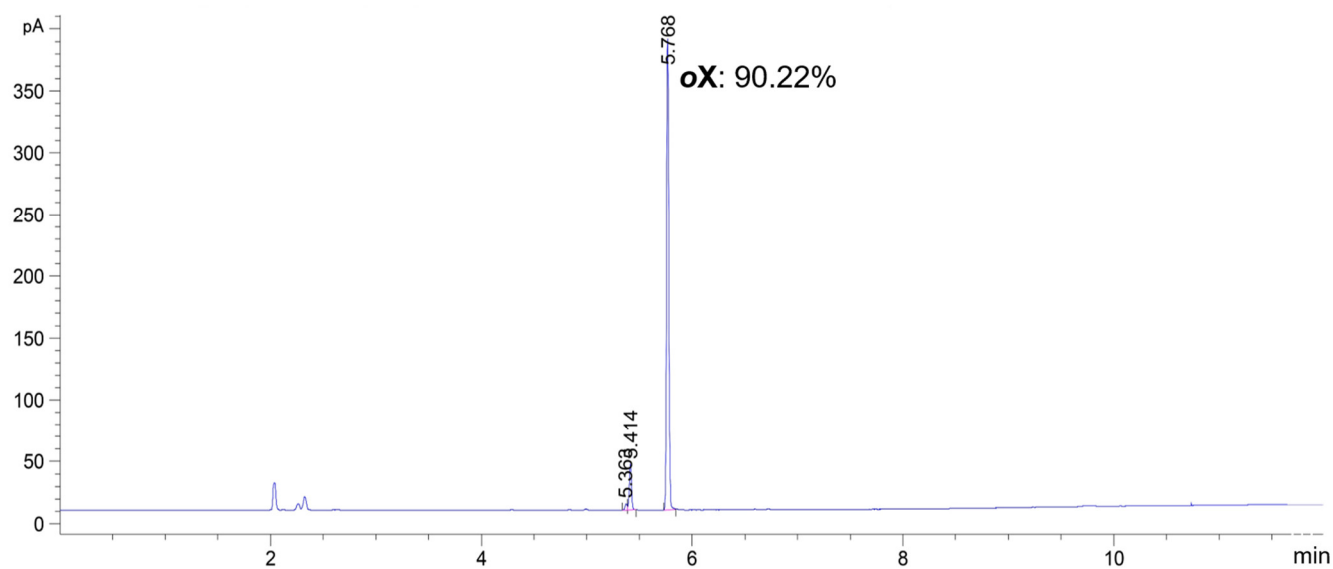

**Fig. S32.** Relative uptakes of *oX*, *mX* and *pX* vapors adsorbed by **H $\alpha$**  for 12 h using head space gas chromatography.

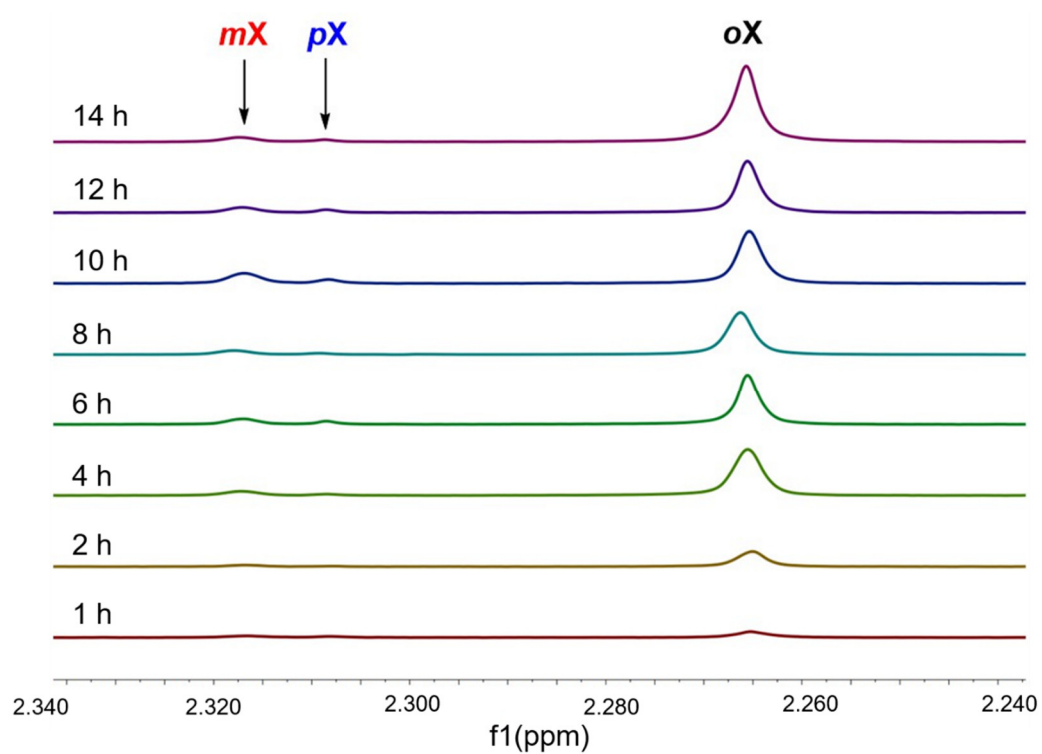

**Fig. S33.** Partial  $^1\text{H}$  NMR spectra (600 MHz,  $\text{CDCl}_3$ , 293 K) of **H $\alpha$**  after adsorption of the ternary vapor mixture (*oX*/*mX*/*pX*,  $v:v:v = 1:1:1$ ) with different adsorption times.

### 10. Recyclability of $H\alpha$

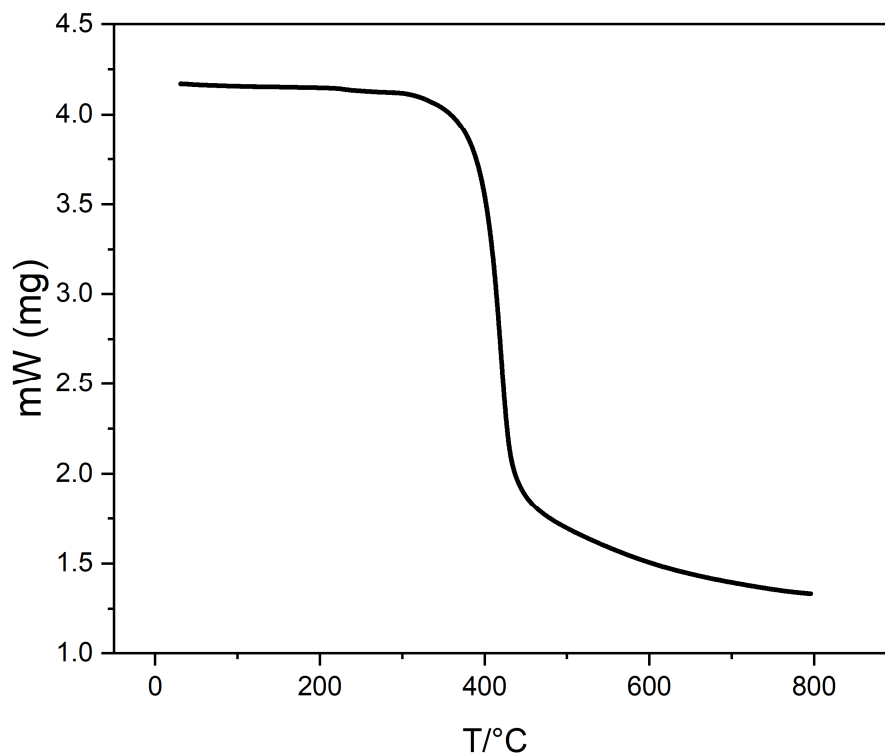

**Fig. S34.** Thermogravimetric analysis of  $oX@H$  using ethanol to dissolve  $oX$ .

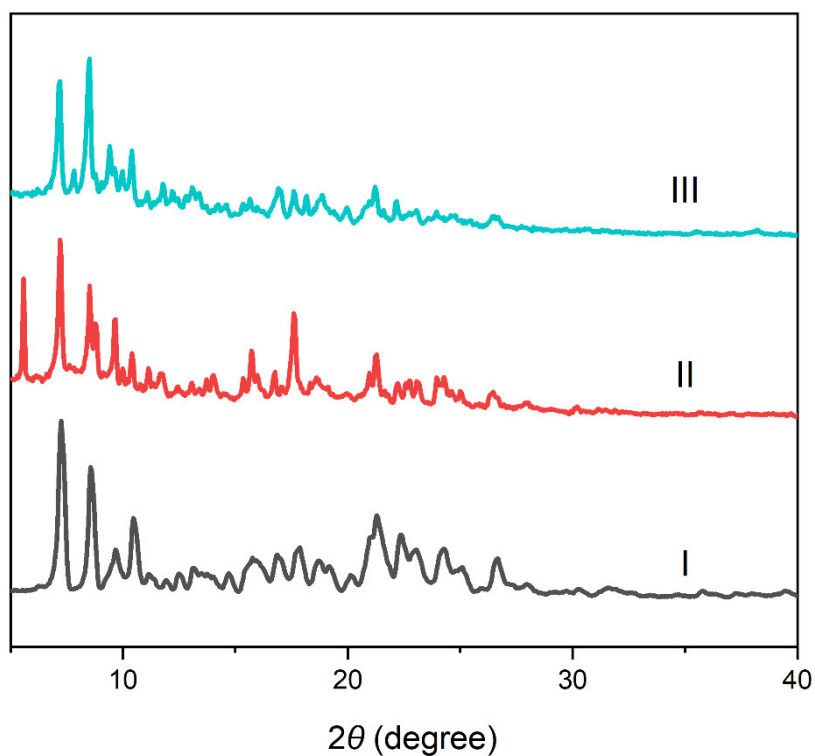

**Fig. S35.** PXRD patterns of: (I) original  $H\alpha$ ; (II)  $H\alpha$  after adsorption of  $oX$  vapor; (III)  $H\alpha$  after 5 adsorption-desorption cycles.



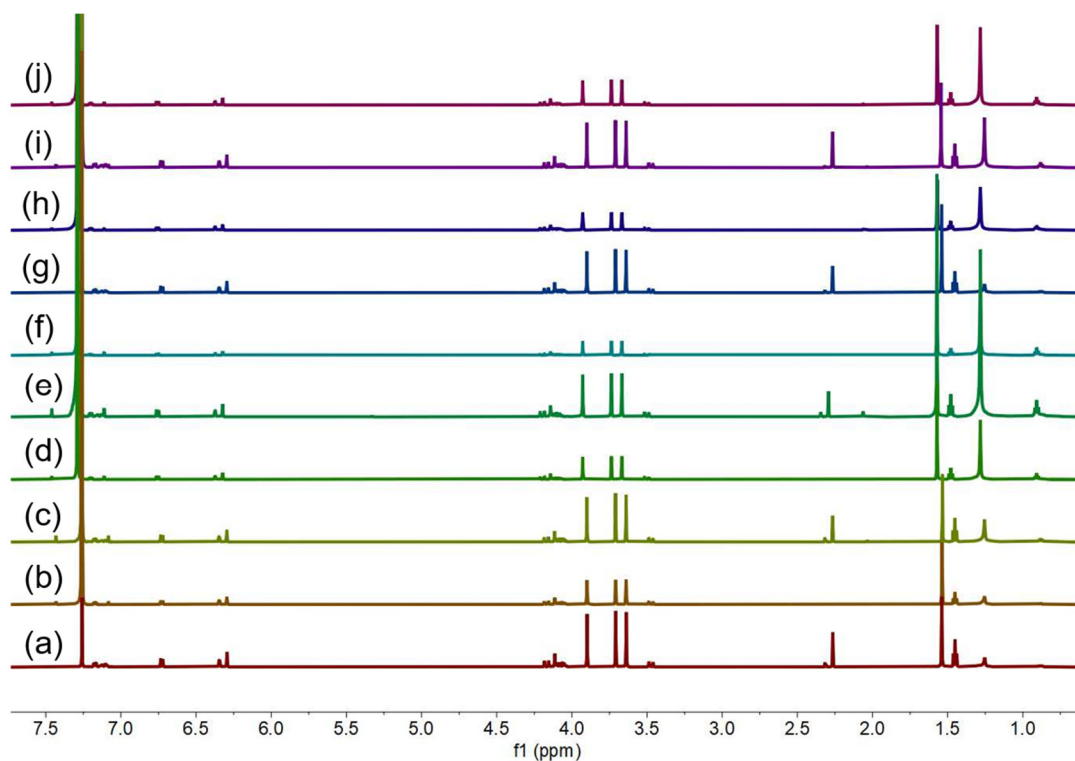

**Fig. S36.** <sup>1</sup>H NMR spectra (600 MHz, CDCl<sub>3</sub>, 293 K) of **H $\alpha$**  after adsorption of the ternary vapor mixture (**oX/mX/pX**,  $\nu:\nu:\nu = 1:1:1$ ) for 5 cycles: (a) **H $\alpha$**  after adsorption of the ternary vapor mixture; (b) **H $\alpha$**  after desorption using ethanol to dissolve **oX** for the first cycle; (c) **H $\alpha$**  after adsorption of the ternary vapor mixture for the second cycle; (d) **H $\alpha$**  after desorption using ethanol to dissolve **oX** for the second cycle; (e) **H $\alpha$**  after adsorption of the ternary vapor mixture for the third cycle; (f) **H $\alpha$**  after desorption using ethanol to dissolve **oX** for the third cycle; (g) **H $\alpha$**  after adsorption of the ternary vapor mixture for the fourth cycle; (h) **H $\alpha$**  after desorption using ethanol to dissolve **oX** for the fourth cycle; (i) **H $\alpha$**  after adsorption of the ternary vapor mixture for the fifth cycle; (j) **H $\alpha$**  after desorption using ethanol to dissolve **oX** for the fifth cycle.

## 11. Liquid-phase adsorption

### 11.1 Single-component adsorption for xylene isomers

In liquid–solid adsorption experiment of **H $\alpha$**  for single-component xylene isomers, 10.0 mg of **H $\alpha$**  was placed in a sealed 2 mL vial containing 1 mL of **oX**, **mX** or **pX** liquid, respectively. Time-dependent liquid–solid plots of **H $\alpha$**  were measured by completely dissolving the crystals and measuring the molar ratios of **oX**, **mX** and **pX** to **H $\alpha$**  by <sup>1</sup>H NMR and PXRD.

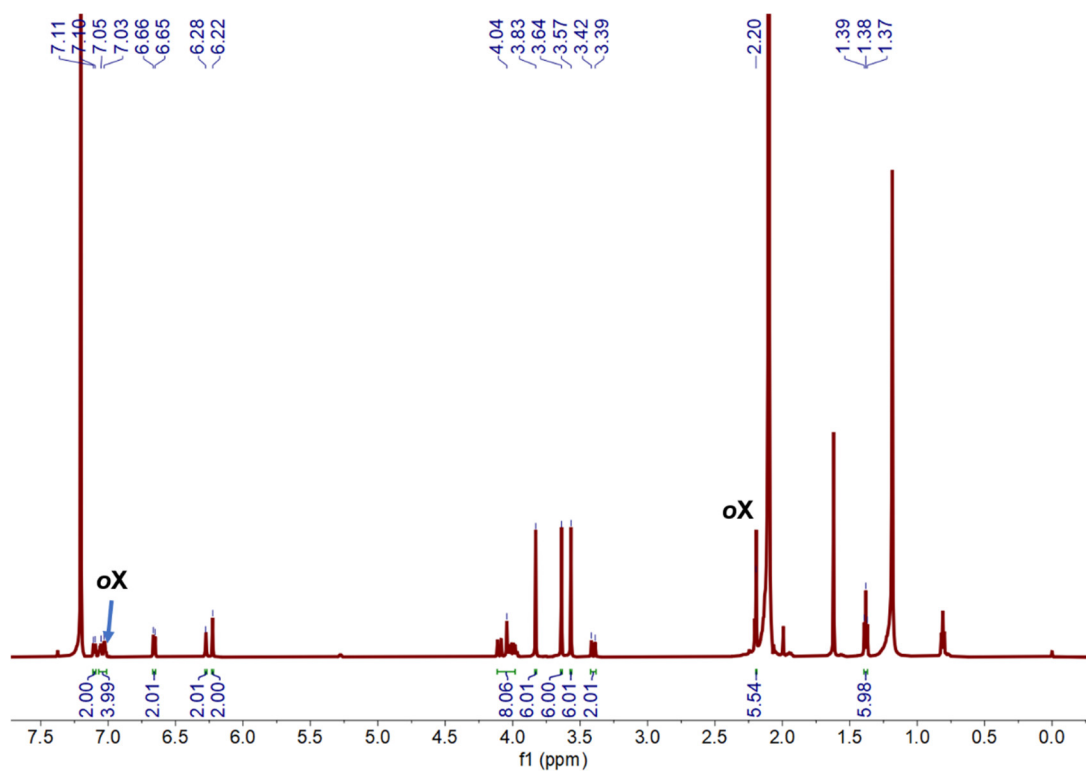

Fig. S37.  $^1\text{H}$  NMR spectrum (600 MHz,  $\text{CDCl}_3$ , 293 K) of **Ha** after adsorption of **oX** liquid for 3 h.

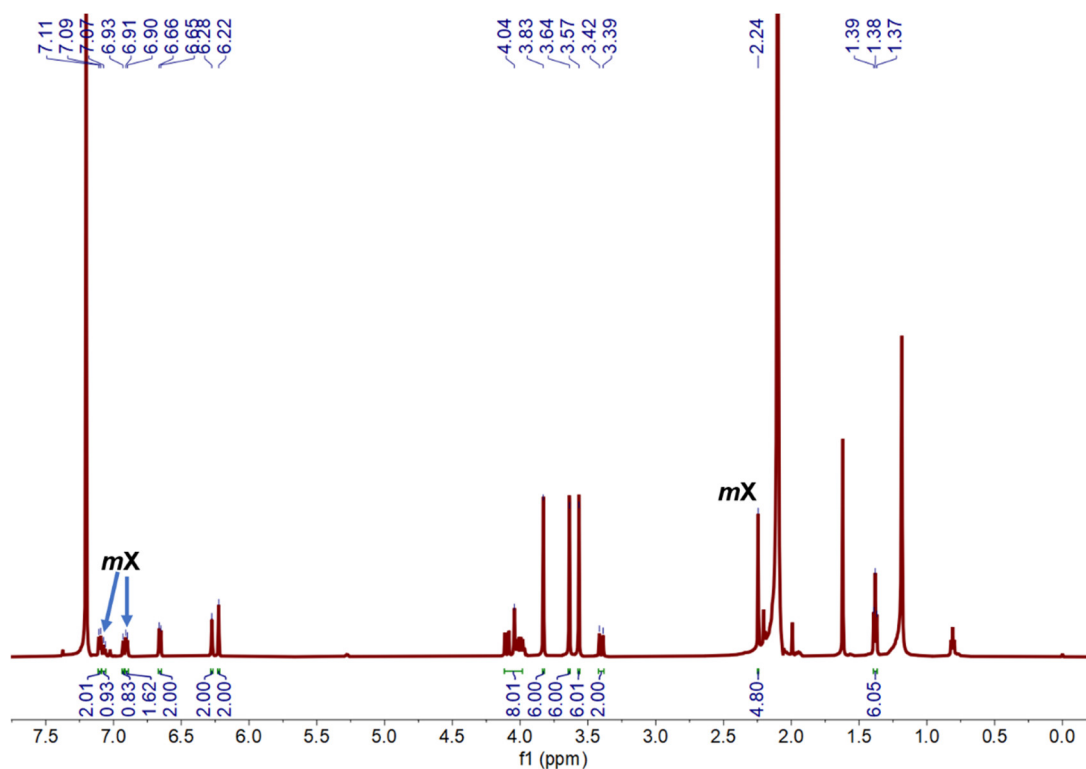

Fig. S38.  $^1\text{H}$  NMR spectrum (600 MHz,  $\text{CDCl}_3$ , 293 K) of **Ha** after adsorption of **mX** liquid for 3 h.

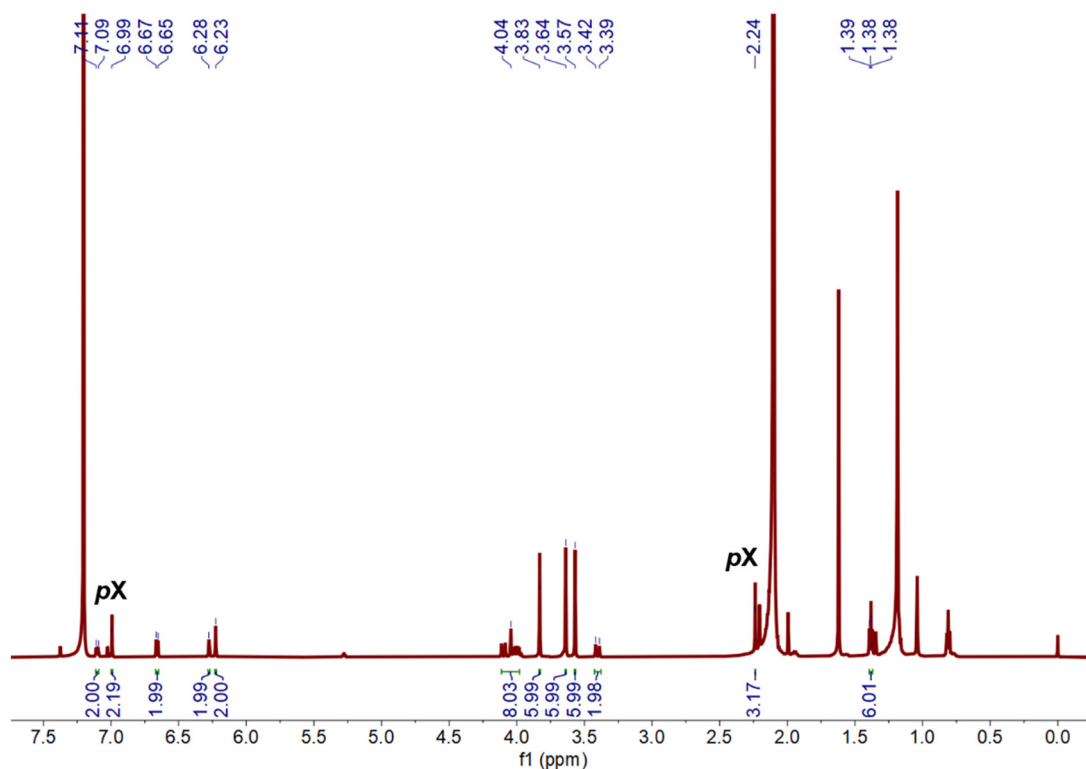

**Fig. S39.**  $^1\text{H}$  NMR spectrum (600 MHz,  $\text{CDCl}_3$ , 293 K) of **Ha** after adsorption of **pX** liquid for 3 h.

### 11.2 Uptake from the ternary liquid mixture of xylene isomers in **Ha**

In liquid–solid adsorption experiment of **Ha** for the ternary liquid mixture of xylene isomers, 10.0 mg of **Ha** was placed in a sealed 2 mL vial containing 1 mL of the mixture of **oX/mX/pX** ( $v:v:v = 1:1:1$ ). Time-dependent liquid–solid adsorption plots of **Ha** were measured by completely dissolving the crystals and measuring the molar ratios of **oX**, **mX** and **pX** to **Ha** by  $^1\text{H}$  NMR, PXRD and GC experiments.

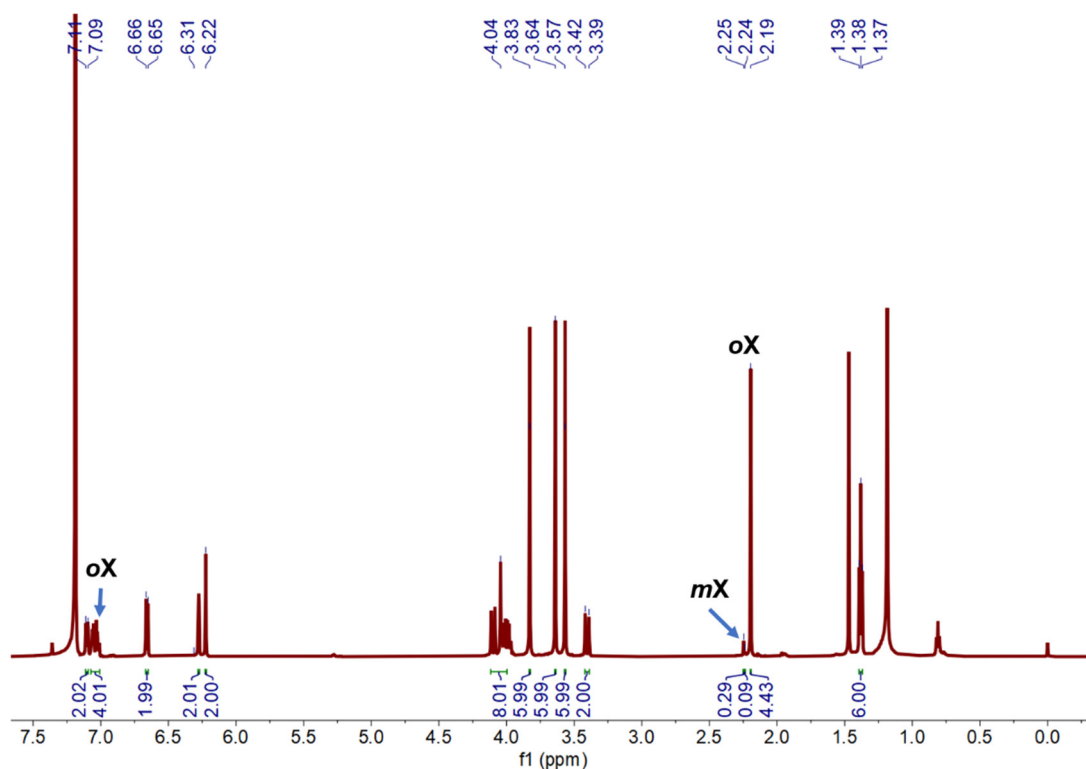

**Fig. S40.**  $^1\text{H}$  NMR spectrum (600 MHz,  $\text{CDCl}_3$ , 293 K) of **Ha** after adsorption of the ternary liquid mixture (**oX**:**mX**:**pX**, v:v:v = 1:1:1) for 3 h.

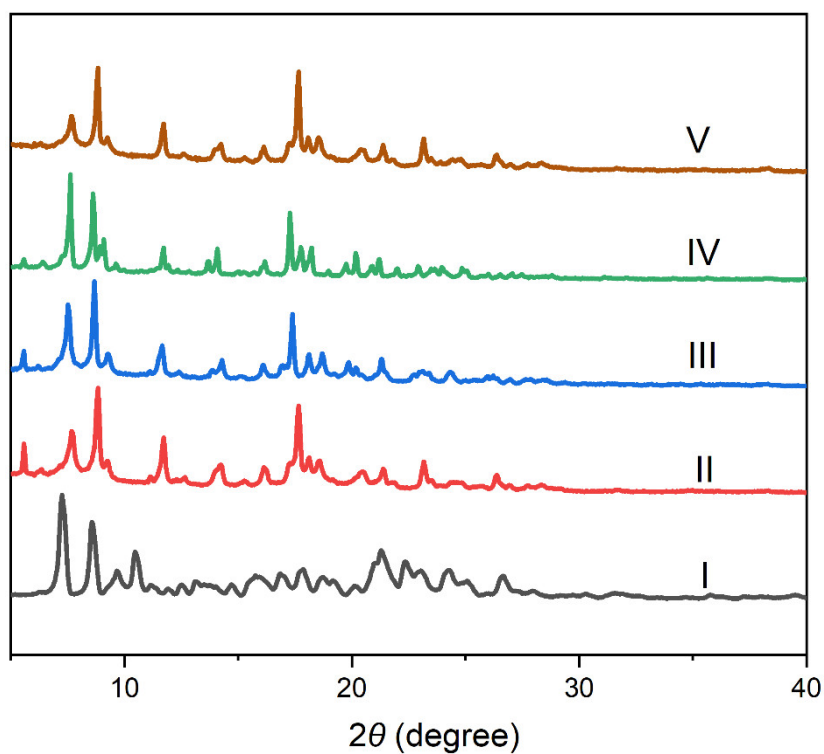

**Fig. S41.** PXRD patterns of: (I) original **Ha**; (II) **Ha** after adsorbing **oX** liquid; (III) **Ha** after adsorbing **mX** liquid; (IV) **Ha** after adsorbing **pX** liquid; (V) **Ha** after adsorbing the ternary liquid mixture (**oX**/**mX**/**pX**, v:v:v = 1:1:1).

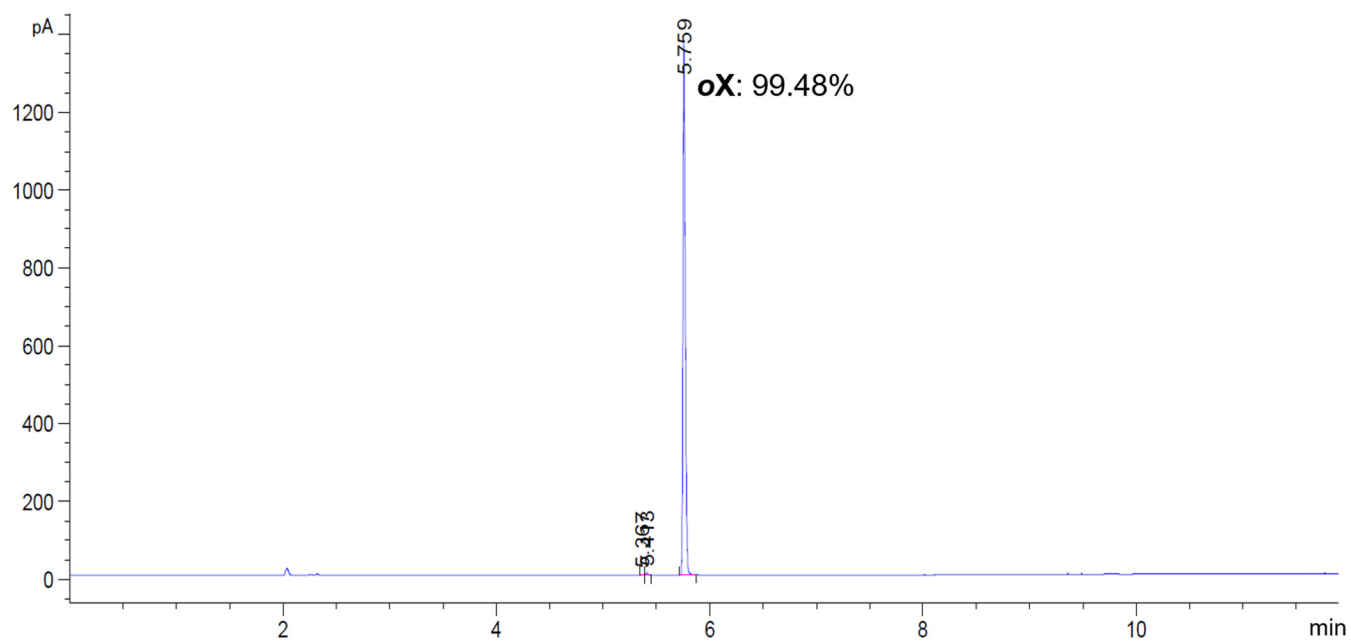

**Fig. S42.** Relative uptakes of *oX*, *mX* and *pX* liquids adsorbed by **H $\alpha$**  for 150 min using head space gas chromatography.

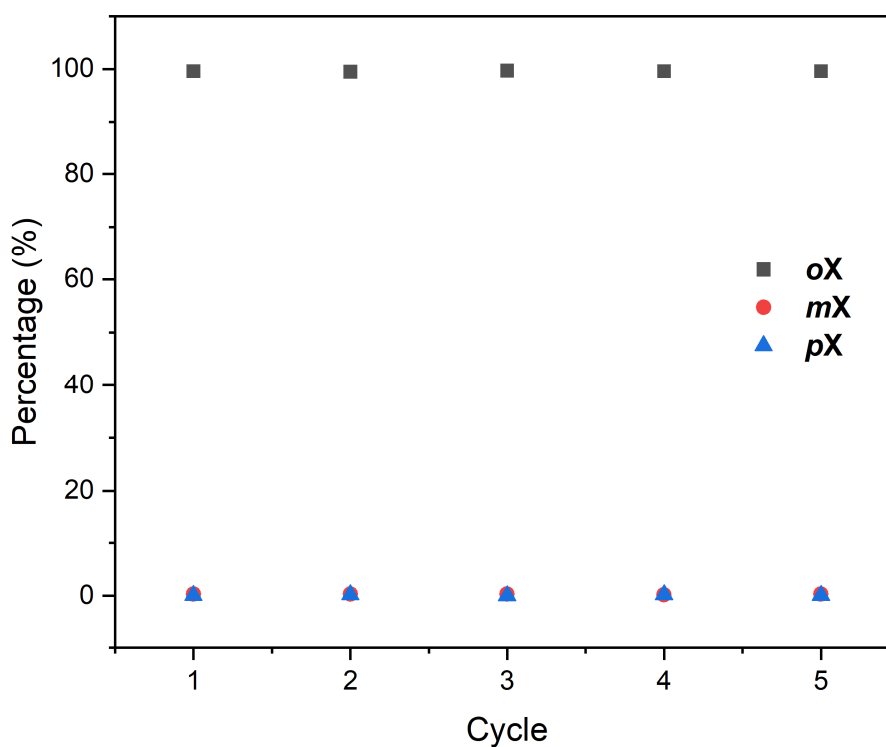

**Fig. S43.** Relative uptakes of *oX*, *mX* and *pX* liquids by **H $\alpha$**  after 5 cycles.

### 12. Adsorption energies calculations of **H $\alpha$** for xylene isomers

**Table S4.** Gibbs free energies of host, guest and host–guest complexes.

|                             | $\Delta G$ (kJ/mol) |
|-----------------------------|---------------------|
| <b>H<math>\alpha</math></b> | -2036.95            |
| <b><i>o</i>X</b>            | -310.873            |
| <b><i>m</i>X</b>            | -310.870            |
| <b><i>p</i>X</b>            | -310.90             |
| <b><i>o</i>X@H</b>          | -2347.92            |
| <b><i>m</i>X@H</b>          | -2348.23            |
| <b><i>p</i>X@H</b>          | -2346.95            |

### 13. References

1. J. Zhou, J. Yang, B. Hua, L. Shao, Z. Zhang and G. Yu, The synthesis, structure, and molecular recognition properties of a [2]calix[1]biphenyl-type hybrid[3]arene. *Chem. Commun.*, 2016, **52**, 1622–1624.
2. J. Zhou, G. Yu, Q. Li, M. Wang and F. Huang, Separation of benzene and cyclohexane by nonporous adaptive crystals of a hybrid[3]arene. *J. Am. Chem. Soc.*, 2020, **142**, 2228–2232.
